# Supplementary material for: WNT11-FZD7-DAAM1 signalling supports tumour initiating abilities and melanoma amoeboid invasion
Source: PubMed Central journal article supplement (PMC7575593; doi:10.1038/s41467-020-18951-2), 2020-10-20
Supplement: 41467_2020_18951_MOESM1_ESM.pdf [file 41467_2020_18951_MOESM1_ESM.pdf]

## **SUPPLEMENTARY INFORMATION**

### **WNT11-FZD7-DAAM1 signalling supports tumour initiating abilities and melanoma amoeboid invasion**

Irene Rodriguez-Hernandez, Oscar Maiques, Leonie Kohlhammer, Gaia Cantelli, Anna Perdrix, Joanne Monger, Bruce Fanshawe, Victoria L. Bridgeman, Sophia N. Karagiannis, Rosa M. Penin, Joaquim Marcolval, Rosa M. Marti, Xavier Matias-Guiu, Gilbert O. Fruhwirth, Jose L. Orgaz, Ilaria Malanchi and Victoria Sanz-Moreno.

Rodriguez-Hernandez *et al.* Supplementary Figure 1

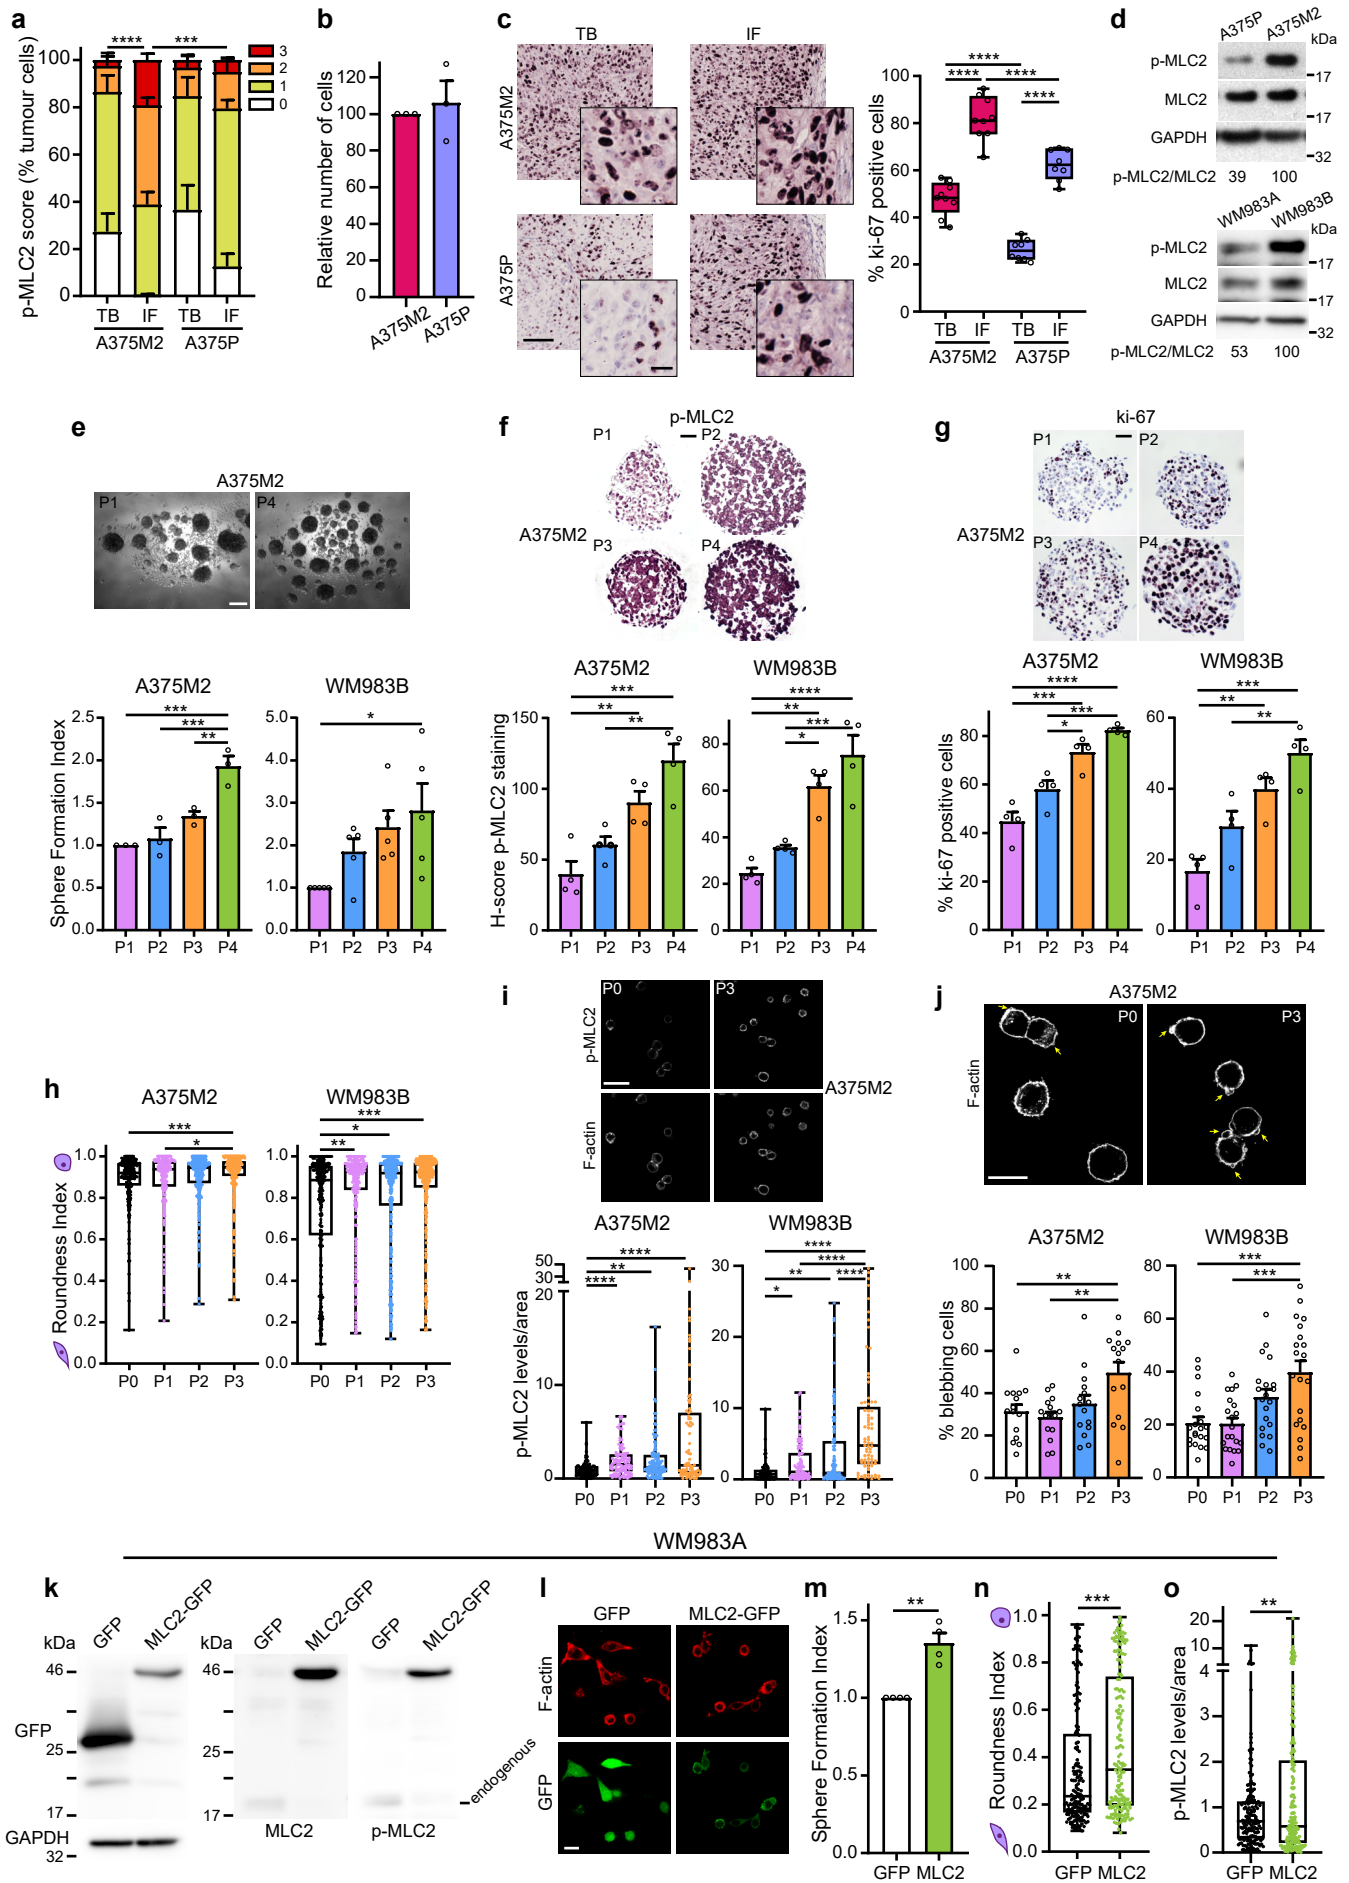

**Supplementary Figure 1. Related to Figure 1. Amoeboid cells support tumour initiation in melanoma *in vitro* and *in vivo***

(a) Quantification of percentage of cells with score intensity 0-3 for p-MLC2 staining in tumour body (TB) and invasive front (IF) of A375M2 (n=9) and A375P (n=8) tumours from 50,000 cells' condition from Fig.1b. (b) Cell viability *in vitro* of A375M2 and A375P cells after 7 days (n=3). (c) Representative images (left) and quantification (right) of ki-67 positive cells in TB and IF of A375M2 (n=9) and A375P (n=8) tumours from 50,000 cells' condition from Fig.1b. Scale bar, 100  $\mu\text{m}$ ; inset, 25  $\mu\text{m}$ . (d) Representative immunoblots of p-MLC2 in the indicated cell lines (n=3). (e) Representative phase-contrast images (top) and quantification of sphere formation index (bottom) of A375M2 (n=3) and WM983B cells (n=5) serially passaged. Scale bar, 250  $\mu\text{m}$ . (f,g) Representative images (top) and quantification (bottom) of (f) H-score of p-MLC2 staining and (g) ki-67 positive cells of A375M2 and WM983B spheres serially passaged (n=4). Scale bar, 50  $\mu\text{m}$ . (h-j) Representative confocal images (top) and quantification (bottom) of (h) cell morphology (>200 cells pooled from n=3), (i) p-MLC2 immunofluorescence signal normalized by cell area (>75 cells pooled from n=4) and (j) percentage of blebbing cells (5 fields of view per experiment for A375M2 and 10 for WM983B, >85 cells per experiment, n=3) of individual A375M2 and WM983B cells from adherent conditions (P0) and from dissociated cells from spheres serially passaged (P1-P3) on collagen I matrix. Scale bar, (i) 50  $\mu\text{m}$  and (j) 20  $\mu\text{m}$ . Yellow arrows indicate blebs. (k,l) (k) Representative immunoblots and (l) representative confocal images of F-actin (red) and GFP (green) of WM983A cells over-expressing EGFP-wild type MLC2 or control EGFP (n=3). Scale bar, 20  $\mu\text{m}$ . (m-o) Quantification of (m) sphere formation index (n=4), (n) cell morphology (>170 cells pooled from n=3) and (o) p-MLC2 immunofluorescence signal normalized by cell area (>165 cells pooled from n=3) of WM983A cells over-expressing EGFP-wild type MLC2 or control EGFP. (a,b,e-g,j,m) Graphs show mean  $\pm$  s.e.m. (c,h,i,n,o) Box limits show 25th and 75th percentiles, the horizontal line shows the median and whiskers show minimum and maximum range of values. (b,d-o) n means number of independent biological experiments. (a,c,e-g,j) One-way ANOVA with Tukey post-hoc test. (b,m-o) two-tailed t-test. (h,i) Kruskal-Wallis with Dunn's multiple comparison test. For all graphs, \* $p$ <0.05, \*\* $p$ <0.01, \*\*\* $p$ <0.001, \*\*\*\* $p$ <0.0001. The exact significant  $p$  values for \* $p$ , \*\* $p$  and \*\*\* $p$  are provided in Supplementary Table 1.

Rodriguez-Hernandez *et al.* Supplementary Figure 2

**a**

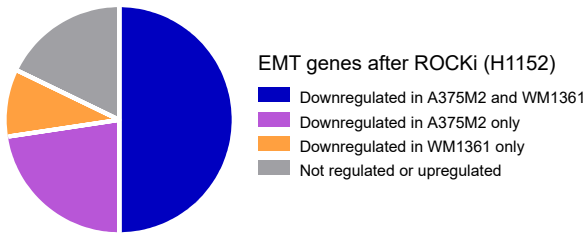

**b**

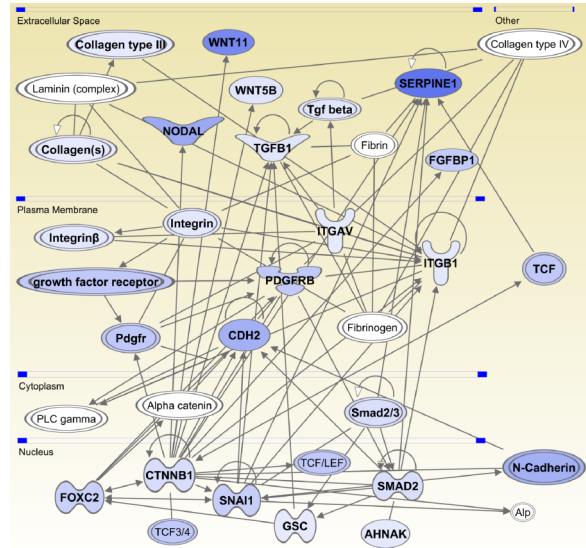

**c**

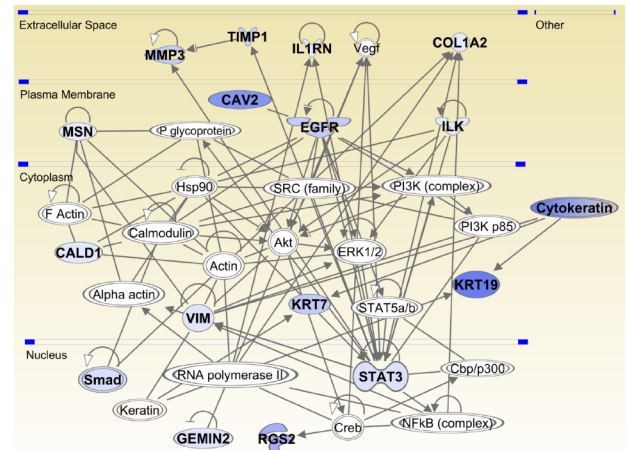

**d**

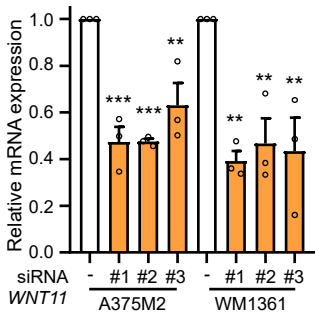

**e**

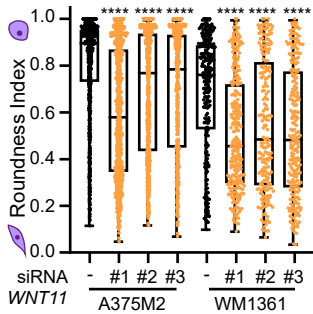

**f**

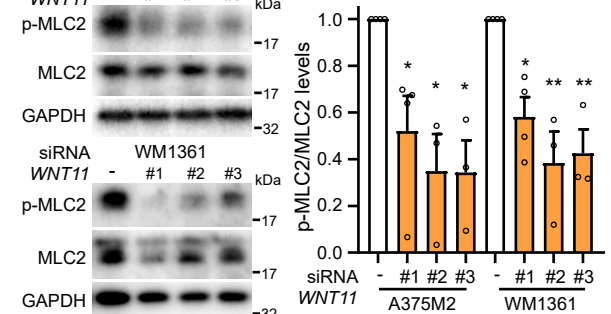

**g**

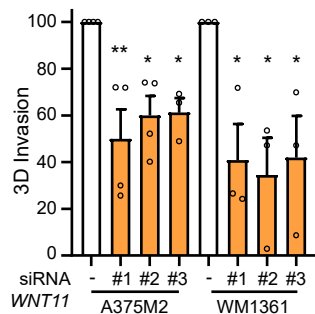

**h**

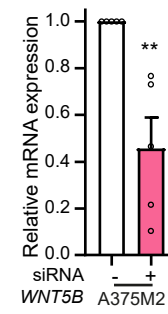

**i**

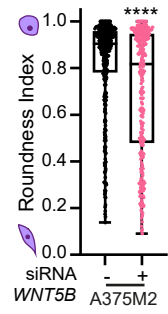

**j**

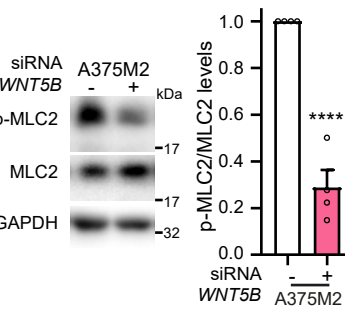

**Supplementary Figure 2. Related to Figure 2. EMT genes regulated by ROCK1/2 control amoeboid invasive features**

(a) Pie chart representing the combined regulation of EMT-related genes in A375M2 and WM1361 cells after 4 h of ROCKi (H1152) (n=4). (b,c) Top two enriched networks of downregulated genes in A375M2 and WM1361 cells after 4 h of ROCKi (H1152) predicted by Ingenuity Pathway Analysis software. (d-g) After *WNT11* knockdown in A375M2 and WM1361 cells, (d) mRNA expression of *WNT11* by qRT-PCR (n=3), (e) quantification of cell morphology (>200 cells pooled from n=3), (f) representative immunoblots (left) and quantification (right) of p-MLC2 levels (n=4 for *WNT11*#1, n=3 for *WNT11*#2 and *WNT11*#3) and (g) 3D invasion index into a collagen I matrix (n=4 for A375M2, n=3 for WM1361). (h-j) After *WNT5B* knockdown in A375M2 cells, (h) mRNA expression of *WNT5B* by qRT-PCR (n=5), (i) quantification of cell morphology (>250 cells pooled from n=3) and (j) immunoblots (left) and quantification (right) of p-MLC2 (n=4). (d,f-h,j) Graphs show mean  $\pm$  s.e.m. (e,i) Box limits show 25th and 75th percentiles, the horizontal line shows the median and whiskers show minimum and maximum range of values. (a,d-j) n means number of independent biological experiments. (d,f,g) One-way ANOVA with Dunnett post-hoc test. (e) Kruskal-Wallis with Dunn's multiple comparison test. (h,j) two-tailed t-test. (i) two-tailed Mann-Whitney test. For all graphs, \* $p$ <0.05, \*\* $p$ <0.01, \*\*\* $p$ <0.001, \*\*\*\* $p$ <0.0001. The exact significant p values for \* $p$ , \*\* $p$  and \*\*\* $p$  are provided in Supplementary Table 1.

### Rodriguez-Hernandez *et al.* Supplementary Figure 3

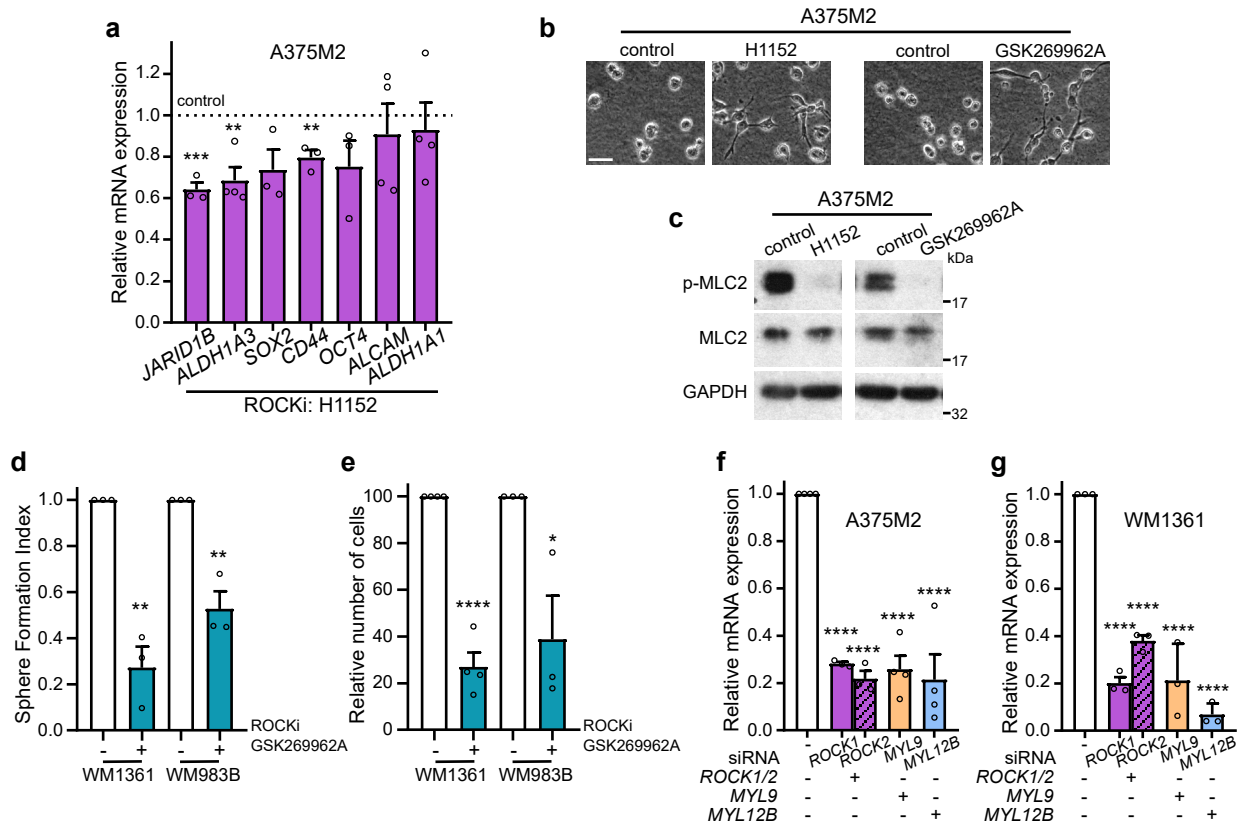

### Supplementary Figure 3. Related to Figure 3. Non-canonical Wnt ligands support melanosphere formation and amoeboid behaviour

(a) mRNA expression of stem cell-related markers by qRT-PCR in A375M2 cells treated with ROCKi (H1152) for 24 h compared to control A375M2 cells (n=3 for *JARID1B*, *SOX2*, *OCT4*, *CD44*; n=4 for *ALDH1A3*, *ALCAM*, *ALDH1A1*). (b) Representative phase-contrast images and (c) immunoblots of p-MLC2 in A375M2 cells after 24 h treatment with ROCKi (H1152 or GSK269962A) (n=3). Scale bar, 50µm. (d-e) Quantification of (d) sphere formation index (n=3) and (e) cell viability (n=4 for WM1361, n=3 for WM983B) of WM1361 and WM983B cells treated with one dose of ROCKi (GSK269962A). (f,g) mRNA expression of indicated genes by qRT-PCR in (f) A375M2 (n=4) and (g) WM1361 cells (n=3) after *ROCK1/2*, *MYL9* or *MYL12B* knockdown. (a,d-g) Graphs show mean  $\pm$  s.e.m. (a-g) n means number of independent biological experiments. (a,d,e) two-tailed t-test. (f,g) One-way ANOVA with Dunnett post-hoc test. For all graphs, \* $p$ <0.05, \*\* $p$ <0.01, \*\*\* $p$ <0.001, \*\*\*\* $p$ <0.0001. The exact significant  $p$  values for \* $p$ , \*\* $p$  and \*\*\* $p$  are provided in Supplementary Table 1.

Rodriguez-Hernandez *et al.* Supplementary Figure 4

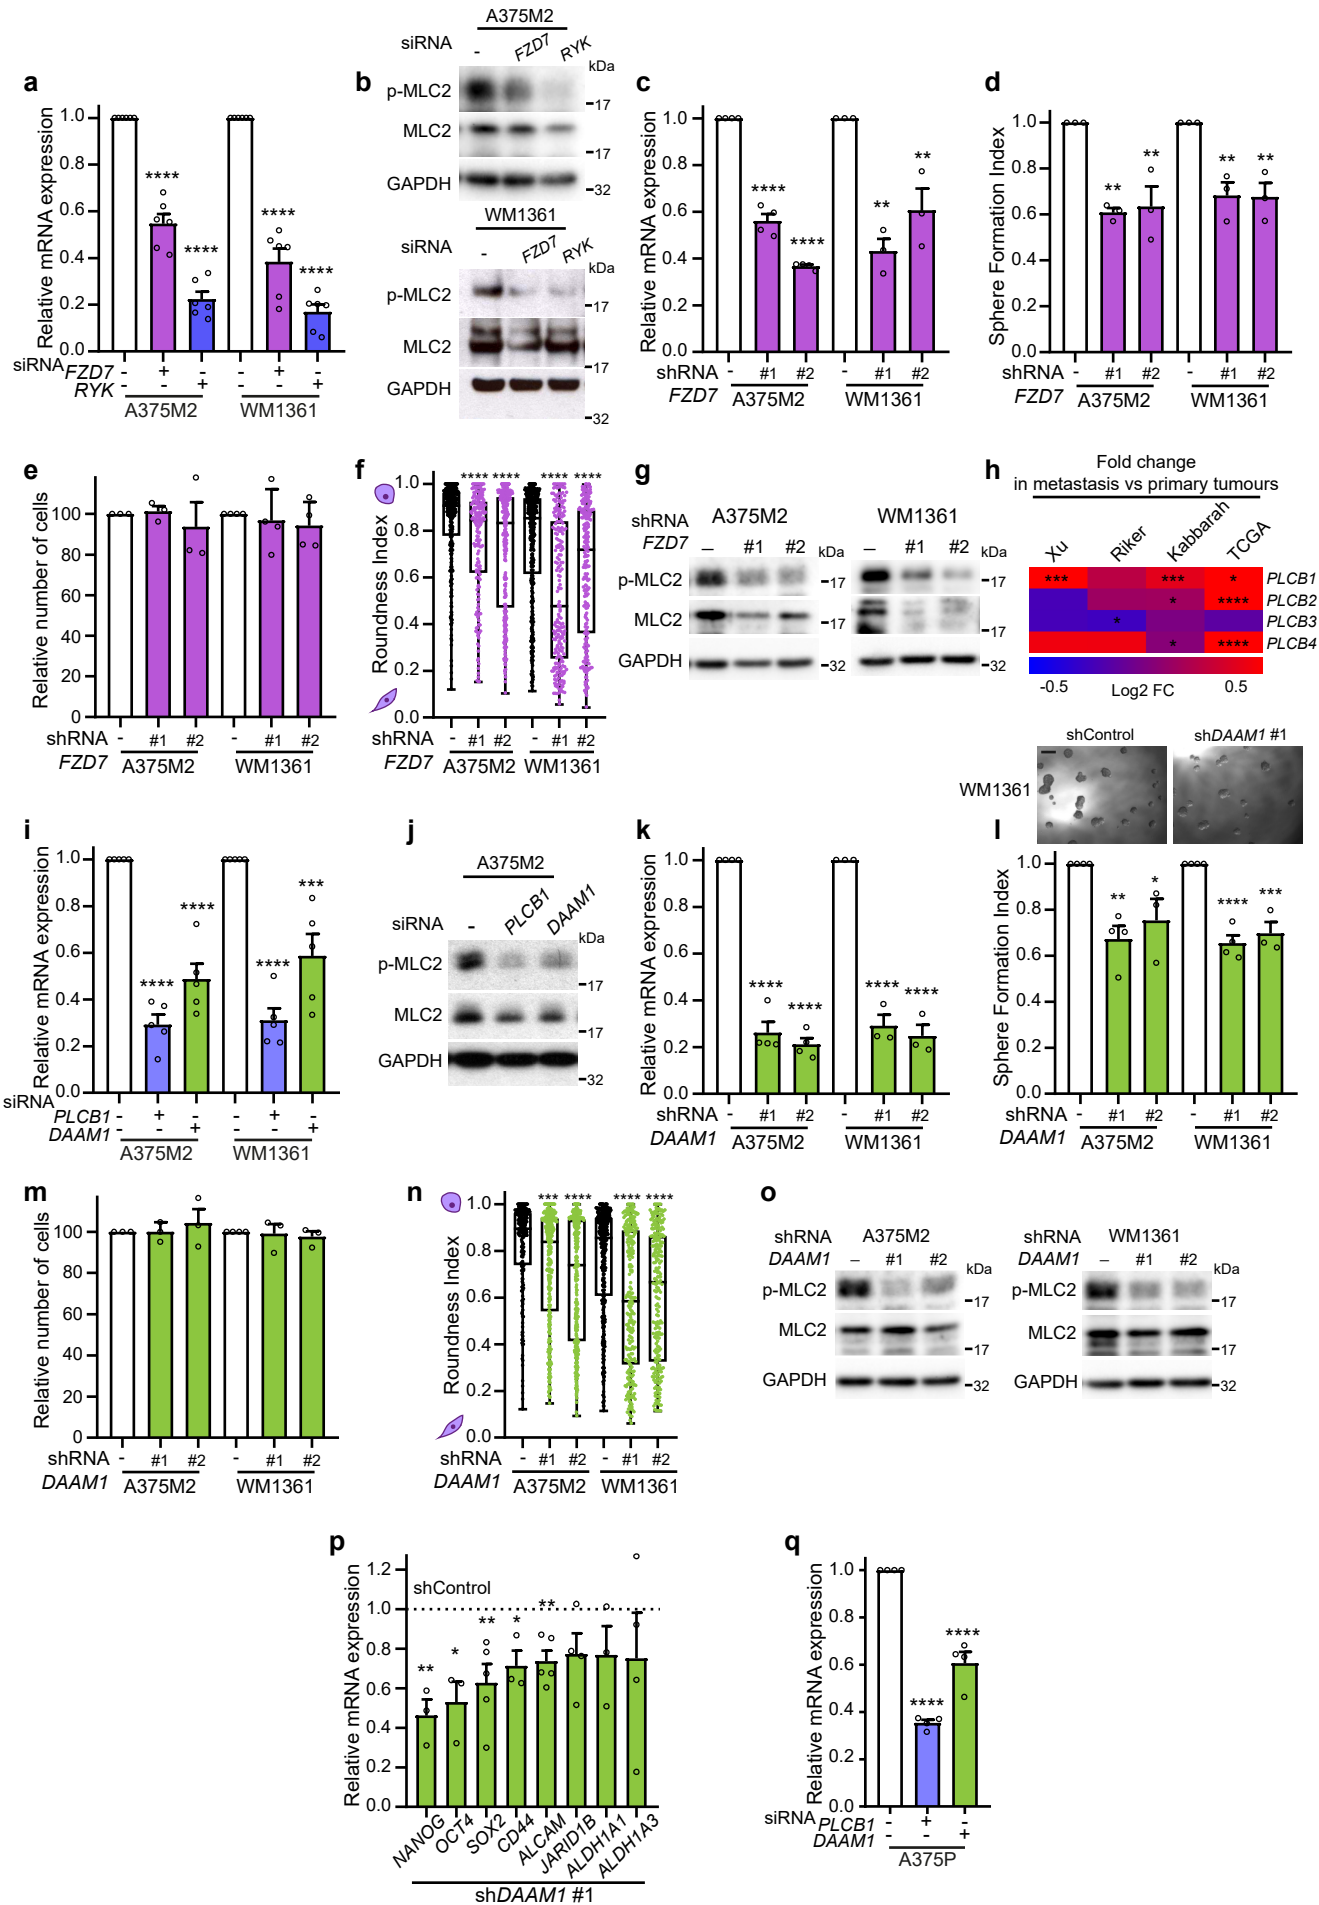

**Supplementary Figure 4. Related to Figure 4. FZD7 downstream of WNT11 supports melanosphere formation and amoeboid invasion via DAAMI**

(a,b) After *FZD7* or *RYK* knockdown in A375M2 and WM1361 cells, (a) mRNA expression of indicated genes by qRT-PCR (n=6) and (b) representative immunoblots of p-MLC2 (n=3 for A375M2, n=4 for WM1361). (c-g) (c) mRNA expression of *FZD7* by qRT-PCR (n=4 for A375M2, n=3 for WM1361), quantification of (d) sphere formation index (n=3), (e) cell viability (n=3 for A375M2, n=4 for WM1361) and (f) cell morphology (>200 cells pooled from n=3) and (g) representative immunoblots of p-MLC2 (n=3) in A375M2 and WM1361 cells expressing non-silencing shRNA (shControl) and two different shRNAs against *FZD7* (sh*FZD7*). (h) Heatmap representing log<sub>2</sub> fold change in *PLCB* isoforms' expression in metastatic versus primary melanoma samples. Raw data were obtained from GEO and TCGA databases. (i,j) After *PLCB1* or *DAAMI* knockdown in A375M2 and WM1361 cells, (i) mRNA expression of indicated genes by qRT-PCR (n=5) and (j) representative immunoblots of p-MLC2 (n=3). (k-p) (k) mRNA expression of *DAAMI* by qRT-PCR (n=5), (l) representative phase-contrast images (scale bar, 250 μm) (top) and quantification of sphere formation index (bottom) (n=4 for sh*DAAMI*#1, n=3 for sh*DAAMI*#2), (m) cell viability (n=3 for A375M2, n=4 for WM1361), (n) cell morphology (>200 cells pooled from n=3), (o) representative immunoblots of p-MLC2 (n=3) and (p) mRNA expression of stem cell-related markers by qRT-PCR (n=3 for *NANOG*, *OCT4*, *CD44*, *ALDH1A1A*; n=4 for *JARID1B*, *ALDH1A3*; n=5 for *SOX2*, *ALCAM*) in A375M2 and WM1361 cells expressing shControl and two different shRNA against *DAAMI* (sh*DAAMI*). (q) mRNA expression of indicated genes by qRT-PCR in A375P cells after *PLCB1* or *DAAMI* knockdown (n=4). (a,c-e,i,k-m,p,q) Graphs show mean ± s.e.m. (f,n) Box limits show 25th and 75th percentiles, the horizontal line shows the median and whiskers show minimum and maximum range of values. (a-g,i-q) n means number of independent biological experiments. (a,c-e,i,k-m,q) One-way ANOVA with Dunnett post-hoc test. (f,n) Kruskal-Wallis with Dunn's multiple comparison test. (h) two-tailed t-test with Welch's correction. (p) two-tailed t-test. For all graphs, \**p*<0.05, \*\**p*<0.01, \*\*\**p*<0.001, \*\*\*\**p*<0.0001. The exact significant *p* values for \**p*, \*\**p* and \*\*\**p* are provided in Supplementary Table 1.



Rodriguez-Hernandez *et al.* Supplementary Figure 5

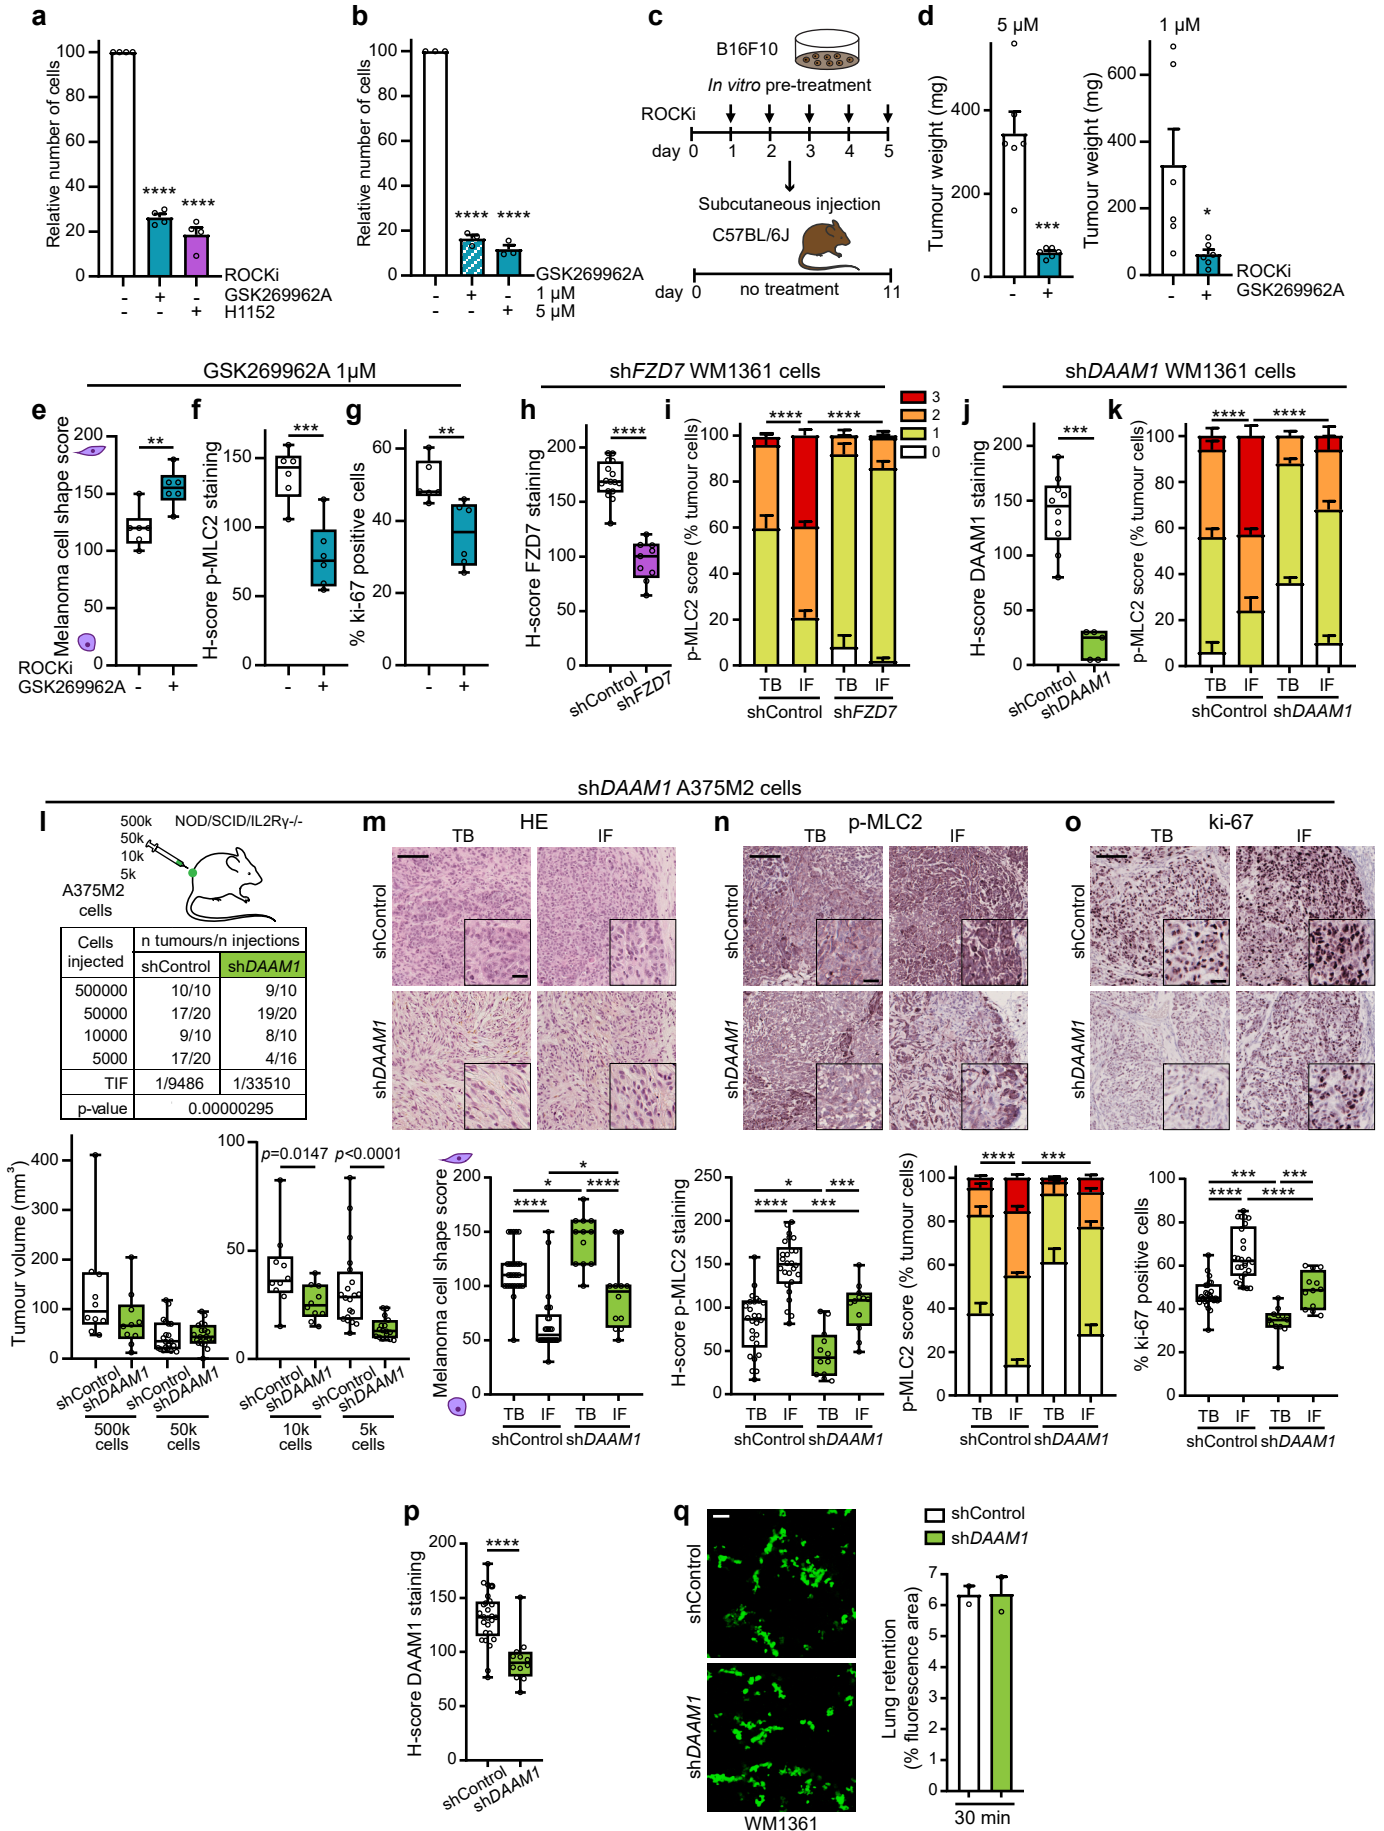

**Supplementary Figure 5. Related to Figure 5. FZD7-DAAM1-RhoA-ROCK1/2 supports tumour initiation and metastasis *in vivo***

(a) Cell viability of A375M2 cells treated with ROCKi (5 $\mu$ M H1152 or 5 $\mu$ M GSK269962A) for 5 days *in vitro* (n=4). (b) Cell viability of B16F10 cells treated with ROCKi (5 $\mu$ M or 1 $\mu$ M GSK269962A) for 5 days *in vitro* (n=3). (c,d) (c) Schematic of experiment and (d) tumour weight of ROCKi (5 $\mu$ M or 1 $\mu$ M GSK269962A) pre-treated B16F10 cells 11 days post-subcutaneous injection in C57BL/6J mice (n=6 mice/group). (e-g) Quantification of (e) melanoma cell shape score, (f) H-score of p-MLC2 staining and (g) ki-67 positive cells in B16F10 tumours (n=6 tumours/group) from (c). (h,i) Quantification of (h) FZD7 staining and (i) percentage of cells with score intensity 0-3 for p-MLC2 staining in shControl (n=16) and shFZD7 (n=9) WM1361 derived tumours from 50,000 cells' condition from Fig.5e. (j,k) Quantification of (j) DAAM1 staining and (k) percentage of cells with score intensity 0-3 for p-MLC2 staining in shControl (n=10) and shDAAMI (n=5) WM1361 derived tumours from 50,000 cells' condition from Fig.5i. (l) Limiting dilution assay estimating tumour initiating frequency (TIF) (top) and tumour volume (bottom) of shControl and shDAAMI A375M2 cells when injected at different dilutions (500,000, 50,000, 10,000 and 5,000 cells) in NOD/SCID/IL2R $\gamma$ <sup>-/-</sup> (NSG) mice (Number of tumours per condition indicated in table). TIF was determined using ELDA. (m-o) Representative images (top) and quantification (bottom) of (m) melanoma cell shape score, (n) H-score and percentage of cells with score intensity 0-3 for p-MLC2 staining and (o) ki-67 positive cells in TB and IF of shControl (n=26) and shDAAMI (n=12) derived tumours from 10,000 and 5,000 cells' conditions from (l). Scale bar, 100  $\mu$ m; inset, 25  $\mu$ m. (p) Quantification of DAAM1 staining in shControl (n=26) and shDAAMI (n=12) A375M2 derived tumours from 10,000 and 5,000 cells' conditions from (l). (q) Representative confocal images (left) and percentage of fluorescence area (right) of mouse lungs 30 min after tail vein injection of WM1361 cells expressing shControl or shDAAMI constructs (n=2 mice/group). Scale bar, 50 $\mu$ m. (a,b,d,i,k,q) Graphs show mean  $\pm$  s.e.m. (e-h,j,l-p) Box limits show 25th and 75th percentiles, the horizontal line shows the median and whiskers show minimum and maximum range of values. (a,b) One-way ANOVA with Dunnett post-hoc test. (d-h,q) two-tailed t-test. (j,l,p) two-tailed Mann-Whitney test. (i,k,m-o) One-way ANOVA with Tukey post-hoc test. For all graphs, \* $p$ <0.05, \*\* $p$ <0.01, \*\*\* $p$ <0.001, \*\*\*\* $p$ <0.0001. The exact significant p values for \* $p$ , \*\* $p$  and \*\*\* $p$  are provided in Supplementary Table 1. Schematics in this figure were created using Servier Medical Art templates licensed under a Creative Commons Attribution 3.0 Unported License (<https://smart.servier.com>).



**Supplementary Figure 6. Related to Figure 6. Amoeboid behaviour enhances tumour formation, tumour progression and metastasis *in vivo***

(a,b) Representative images of score intensity 0-3 for p-MLC2 staining in (a) IF and (b) distal invasive front (DIF) from primary tumours from Fig.6a. Dashed lines represent the boundary between IF and DIF. Scale bar, 50  $\mu\text{m}$ . (c) Heatmaps showing expression of top 100 proliferative and invasive genes from Verfaillie study<sup>1</sup> enriched in A375M2 cells compared to A375M2 cells treated with ROCKi (H1152, Y27632) and blebbistatin or to A375P cells<sup>2</sup>. (d) GSEA plots showing enrichment of proliferative and invasive gene signatures from Hoek study<sup>3</sup> in A375M2 cells compared to A375M2 cells treated with ROCKi (H1152, Y27632) and blebbistatin or to A375P cells<sup>2</sup>. NES, normalized enrichment score; FDR, false discovery rate. (e) Representative images of mouse lungs (left) and quantification of tumour area (right) 30 min after tail vein injection of 4599 cells pre-treated with ROCKi (5 $\mu\text{M}$  GSK269962A) for 24 h in NSG mice (n=2 mice/group). Scale bar, 100  $\mu\text{m}$ . (e) Graphs show mean  $\pm$  s.e.m. (e) two-tailed Mann-Whitney test.

Rodriguez-Hernandez *et al.* Supplementary Figure 7

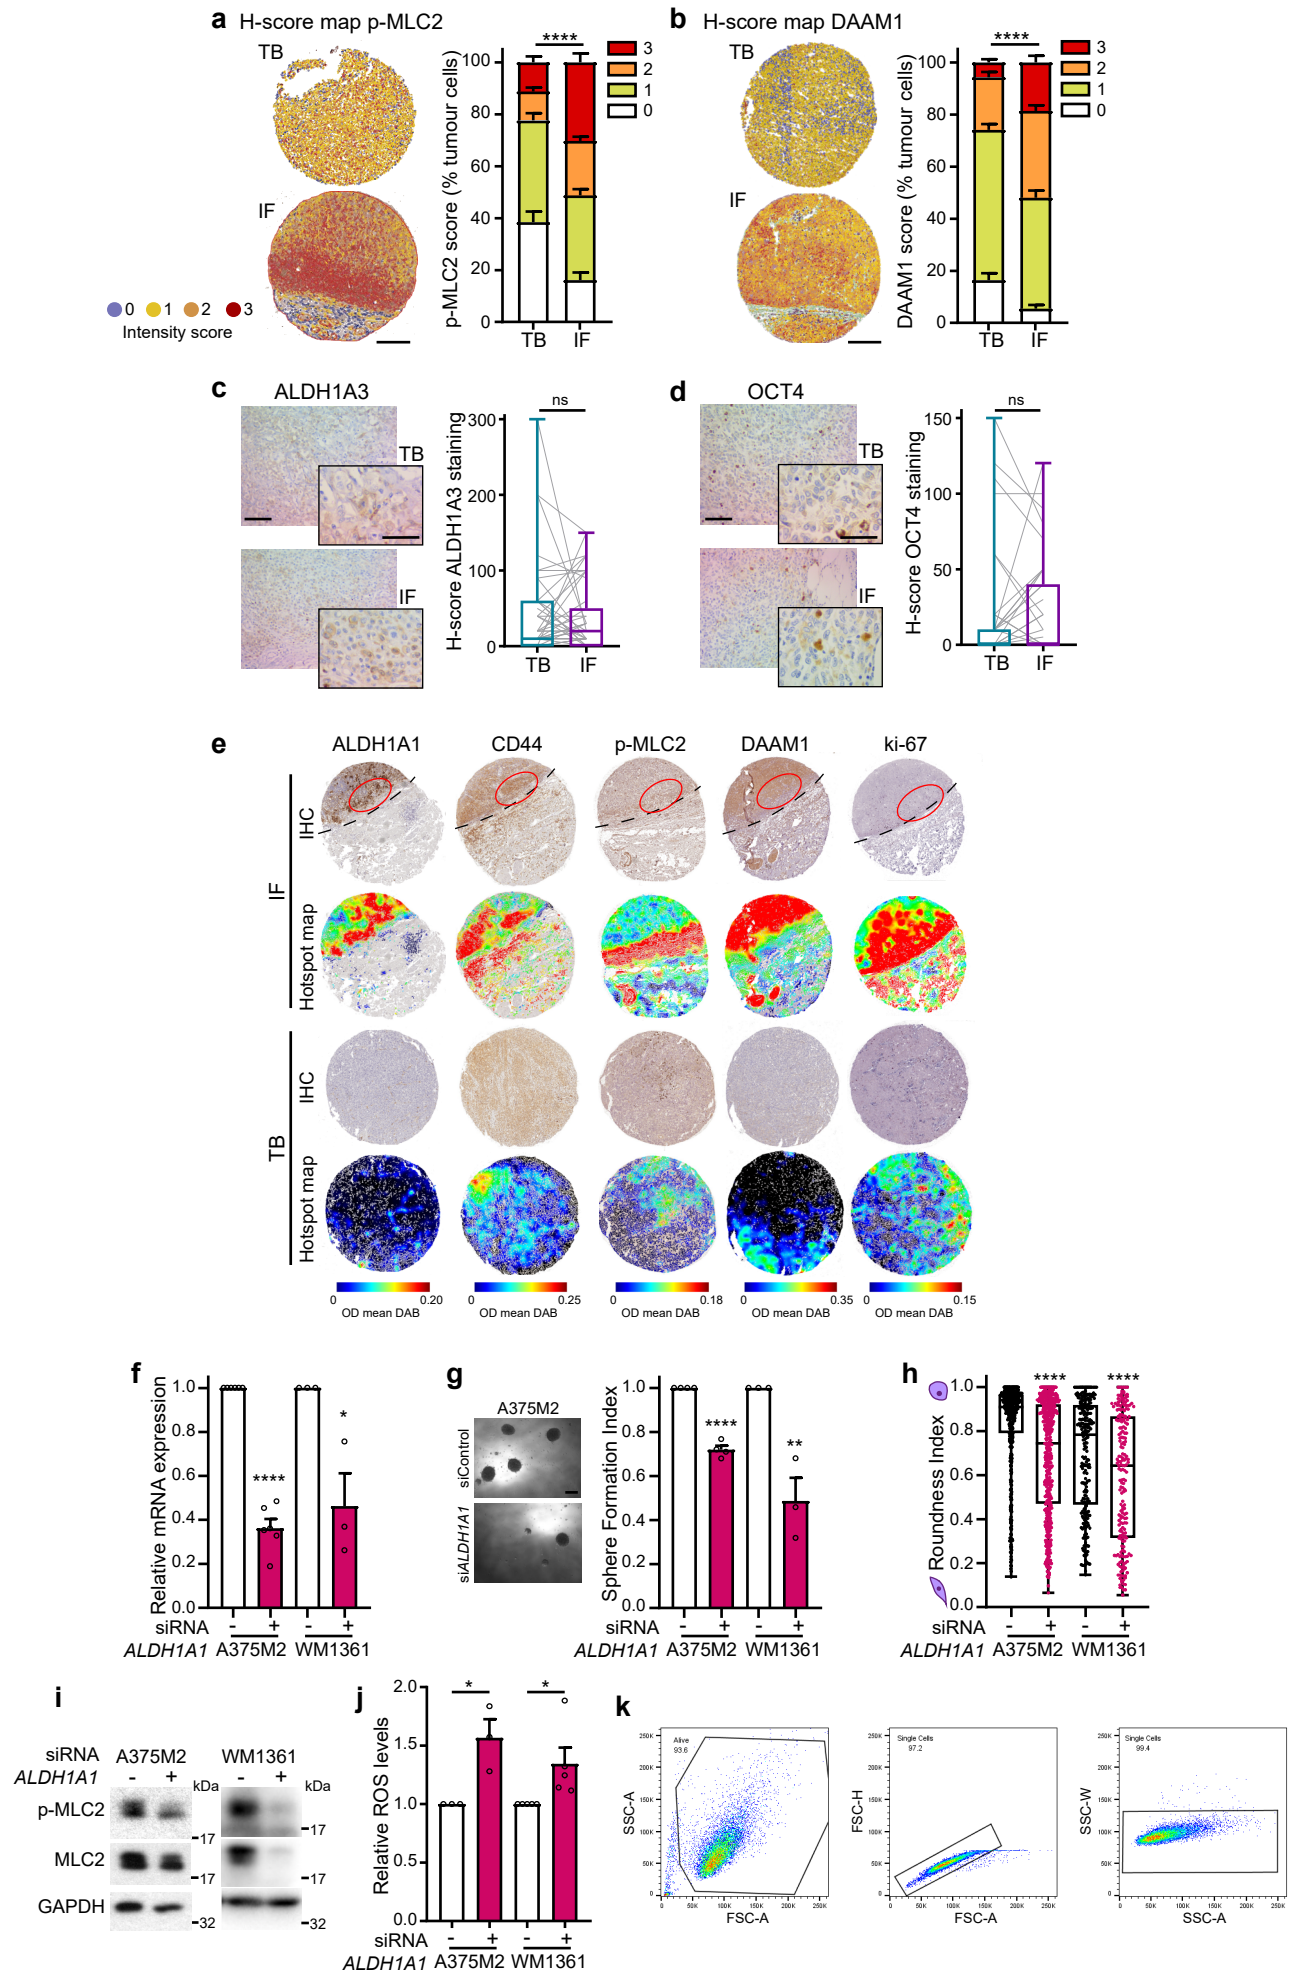

### Supplementary Figure 7. Related to Figure 7. Analysis of the invasive front of human primary melanomas

(a,b) Representative images (left) and quantification (right) of percentage of cells with score intensity 0-3 for (a) p-MLC2 staining and (b) DAAM1 staining in matched TB and IF from primary melanomas. Scale bar, 300  $\mu\text{m}$ . (c,d) Representative images (left) and quantification (right) of (c) ALDH1A3 and (d) OCT4 in matched TB and IF from primary melanomas. Scale bar, 100  $\mu\text{m}$ ; inset, 50  $\mu\text{m}$ . (a-d) 53 primary melanomas. (e) IHC images and hotspot maps for ALDH1A1, CD44, p-MLC2, DAAM1 and ki-67 stainings in consecutive sections of IF and TB areas from a human primary melanoma. Red circles show the areas with higher spatial correlation. (f-j) After *ALDH1A1* knockdown in A375M2 and WM1361 cells, (f) mRNA expression of *ALDH1A1* by qRT-PCR (n=6 for A375M2, n=3 for WM1361), (g) representative phase-contrast images (scale bar, 250  $\mu\text{m}$ ) (left) and quantification of sphere formation index (right) (n=4 for A375M2, n=3 for WM1361), (h) cell morphology (>200 cells pooled from n=3), (i) representative immunoblots of p-MLC2 (n=3) and (j) reactive oxygen species (ROS) measurement (n=3 for A375M2, n=5 for WM1361). (k) Gating strategy for intracellular measurement of ROS. (a,b,f,g,j) Graphs show mean  $\pm$  s.e.m. (c,d,h) Box limits show 25th and 75th percentiles, the horizontal line shows the median and whiskers show minimum and maximum range of values. (f-j) n means number of independent biological experiments. (a-d) two-tailed Wilcoxon test. (f,g,j) two-tailed t-test. (h) two-tailed Mann-Whitney test. For all graphs, \* $p$ <0.05, \*\* $p$ <0.01, \*\*\* $p$ <0.001, \*\*\*\* $p$ <0.0001. The exact significant p values for \* $p$ , \*\* $p$  and \*\*\* $p$  are provided in Supplementary Table 1.

Rodriguez-Hernandez *et al.* Supplementary Figure 8

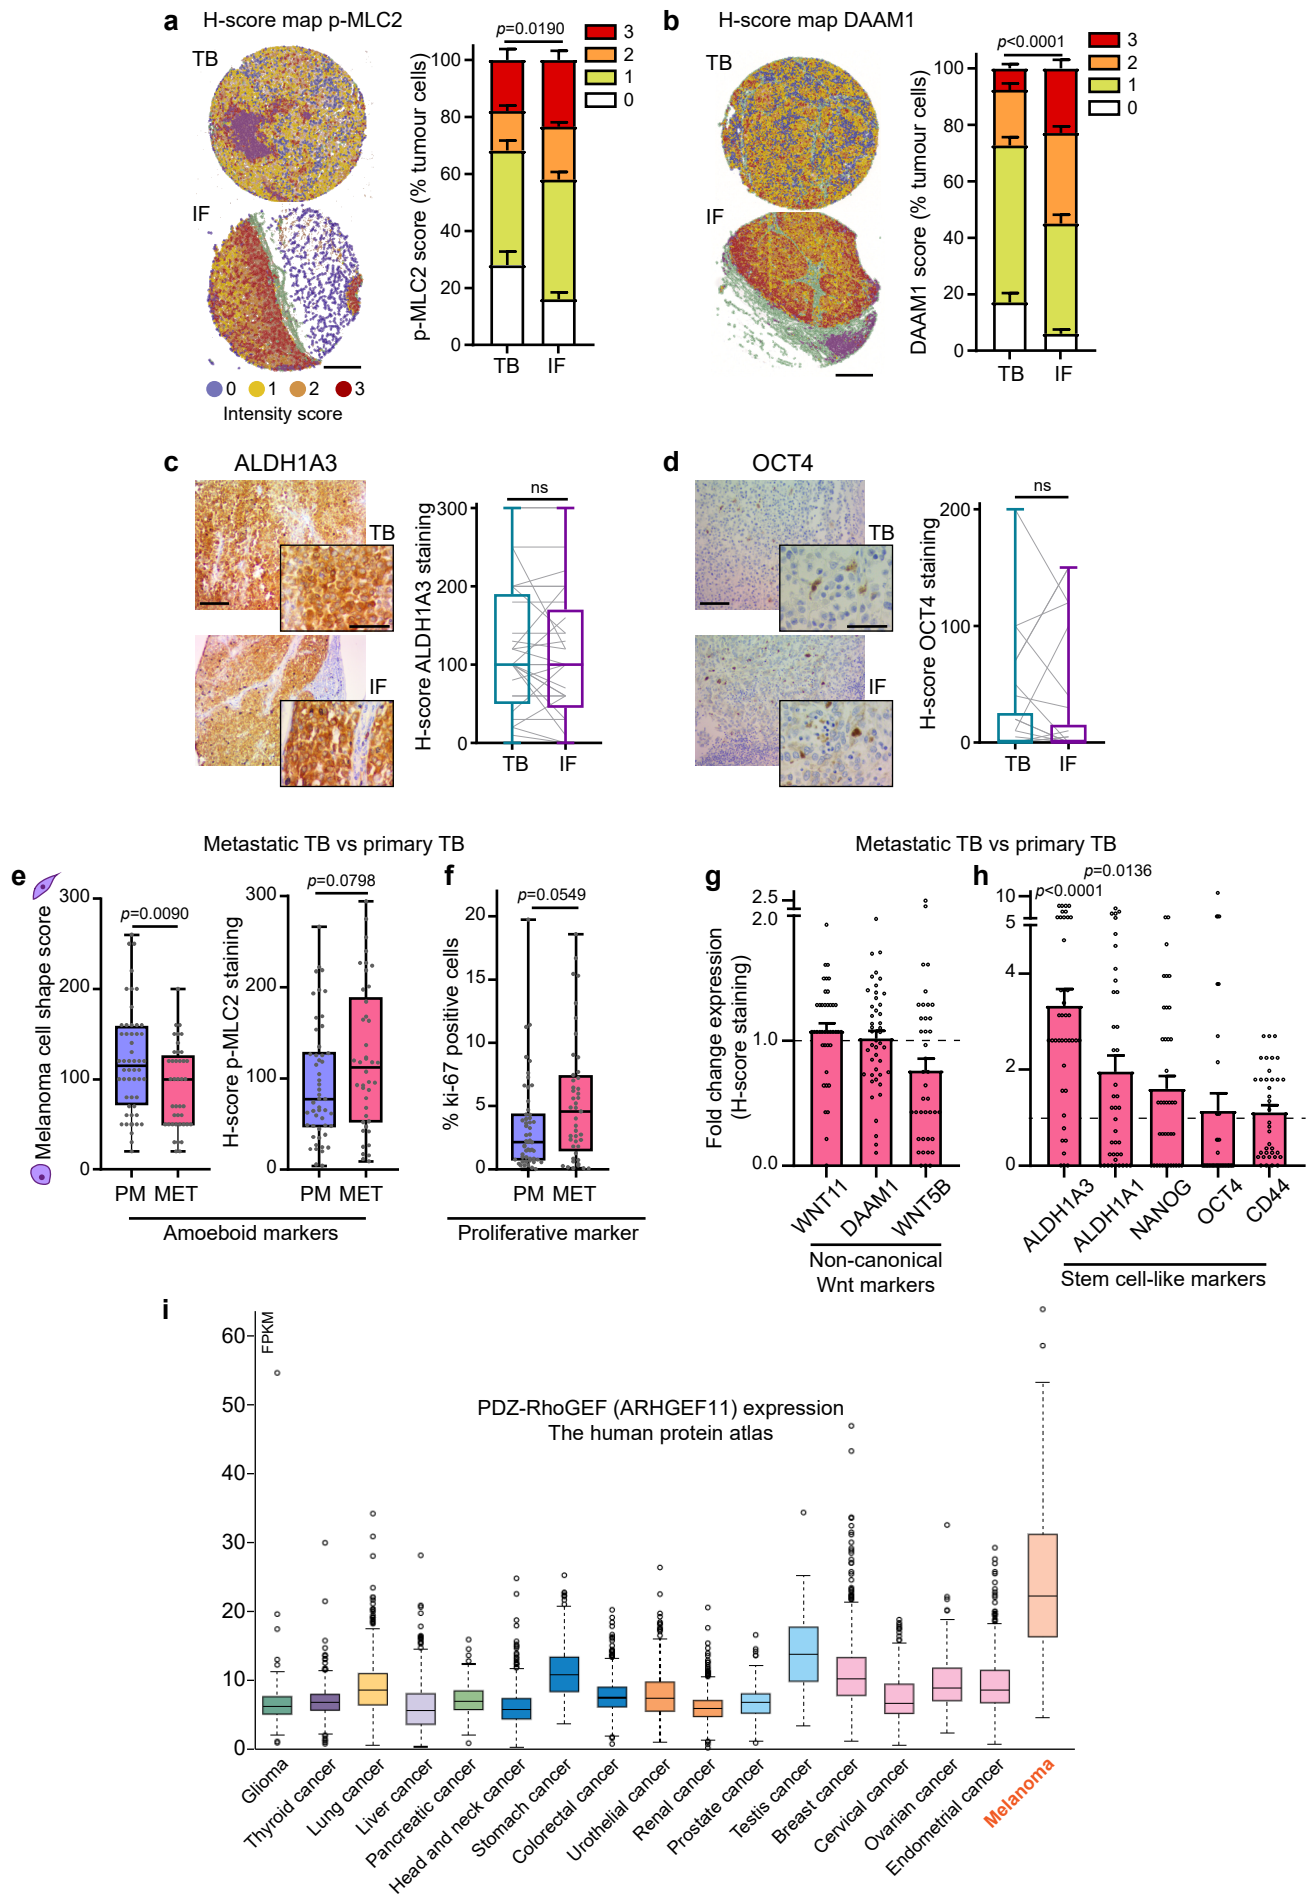

**Supplementary Figure 8. Related to Figure 8. Analysis of the invasive front of human metastatic melanomas**

(**a,b**) Representative images (left) and quantification (right) of percentage of cells with score intensity 0-3 for (**a**) p-MLC2 staining and (**b**) DAAM1 staining in matched TB and IF from melanoma metastasis. Scale bar, 300  $\mu\text{m}$ . (**c,d**) Representative images (left) and quantification (right) of (**c**) ALDH1A3 and (**d**) OCT4 in matched TB and IF from melanoma metastasis. Scale bar, 100  $\mu\text{m}$ ; inset, 50  $\mu\text{m}$ . (a-d) 45 metastatic melanomas. (**e-h**) Fold change expression of (**e**) amoeboid markers, (**f**) ki-67 proliferative marker, (**g**) non-canonical Wnt markers and (**h**) stem cell-like markers in TB of melanoma metastasis compared to TB of primary tumours. (e-h) 53 primary and 45 metastatic melanomas. (**i**) RNA-seq expression data of PDZ-RhoGEF (ARHGGEF11) across tumour types from the human protein atlas ([www.proteinatlas.org](http://www.proteinatlas.org)). (a,b,g,h) Graphs show mean  $\pm$  s.e.m. (c-f) Box limits show 25th and 75th percentiles, the horizontal line shows the median and whiskers show minimum and maximum range of values. (i) Box limits show 25th and 75th percentiles, the horizontal line shows the median and points are displayed as outliers if they are above or below 1.5 times the interquartile range. (a-d) two-tailed Wilcoxon test. (e,g) two-tailed t-test. (f,h) two-tailed Mann-Whitney test.



## Supplementary Table 1. Exact significant p values from figures

|                         |                      |                         |                      |
|-------------------------|----------------------|-------------------------|----------------------|
| <b>Figure 1c</b>        |                      | <b>Figure 1d</b>        |                      |
| <b>Comparison</b>       | <b>Exact p value</b> | <b>Comparison</b>       | <b>Exact p value</b> |
| 500k A375M2 vs. A375P   | * $p=0.0255$         | A375M2 TB vs. A375M2 IF | **** $p<0.0001$      |
| 50k A375M2 vs. A375P    | * $p=0.0105$         | A375M2 TB vs. A375P TB  | ** $p=0.0049$        |
| 5k A375M2 vs. A375P     | ** $p=0.0071$        | A375M2 IF vs. A375P IF  | **** $p<0.0001$      |
|                         |                      | A375P TB vs. A375P IF   | *** $p=0.0004$       |
| <b>Figure 1e</b>        |                      | <b>Figure 1f</b>        |                      |
| <b>Comparison</b>       | <b>Exact p value</b> | <b>Comparison</b>       | <b>Exact p value</b> |
| A375M2 TB vs. A375M2 IF | **** $p<0.0001$      | A375P P1 vs. P3         | * $p=0.0185$         |
| A375M2 IF vs. A375P IF  | ** $p=0.0016$        | A375P P1 vs. P4         | ** $p=0.004$         |
| A375P TB vs. A375P IF   | * $p=0.0265$         | A375P P2 vs. P4         | * $p=0.0493$         |
|                         |                      | WM983A P1 vs. P3        | * $p=0.0168$         |
|                         |                      | WM983A P1 vs. P4        | *** $p=0.0008$       |
|                         |                      | WM983A P2 vs. P4        | ** $p=0.0025$        |
| <b>Figure 1g</b>        |                      | <b>Figure 1h</b>        |                      |
| <b>Comparison</b>       | <b>Exact p value</b> | <b>Comparison</b>       | <b>Exact p value</b> |
| A375P P1 vs. P3         | * $p=0.0393$         | A375P P1 vs. P3         | *** $p=0.0004$       |
| A375P P1 vs. P4         | ** $p=0.0023$        | A375P P1 vs. P4         | *** $p=0.0001$       |
| A375P P2 vs. P4         | * $p=0.0141$         | A375P P2 vs. P3         | ** $p=0.0079$        |
| WM983A P1 vs. P3        | *** $p=0.0001$       | A375P P2 vs. P4         | ** $p=0.0018$        |
| WM983A P1 vs. P4        | **** $p<0.0001$      | WM983A P1 vs. P3        | ** $p=0.0059$        |
| WM983A P2 vs. P3        | * $p=0.0126$         | WM983A P1 vs. P4        | *** $p=0.0003$       |
| WM983A P2 vs. P4        | **** $p<0.0001$      | WM983A P2 vs. P4        | ** $p=0.0042$        |
| WM983A P3 vs. P4        | * $p=0.0312$         |                         |                      |
| <b>Figure 1i</b>        |                      | <b>Figure 1j</b>        |                      |
| <b>Comparison</b>       | <b>Exact p value</b> | <b>Comparison</b>       | <b>Exact p value</b> |
| A375P P0 vs. P1         | **** $p<0.0001$      | A375P P0 vs. P2         | **** $p<0.0001$      |
| A375P P0 vs. P2         | **** $p<0.0001$      | A375P P0 vs. P3         | ** $p=0.001$         |
| A375P P0 vs. P3         | **** $p<0.0001$      | A375P P1 vs. P2         | **** $p<0.0001$      |
| A375P P1 vs. P2         | **** $p<0.0001$      | A375P P1 vs. P3         | **** $p<0.0001$      |
| A375P P1 vs. P3         | * $p=0.0348$         | WM983A P0 vs. P1        | **** $p<0.0001$      |
| WM983A P0 vs. P1        | **** $p<0.0001$      | WM983A P0 vs. P2        | **** $p<0.0001$      |
| WM983A P0 vs. P2        | **** $p<0.0001$      | WM983A P0 vs. P3        | **** $p<0.0001$      |
| WM983A P0 vs. P3        | **** $p<0.0001$      | WM983A P1 vs. P2        | ** $p=0.0054$        |
| WM983A P1 vs. P2        | **** $p<0.0001$      | WM983A P1 vs. P3        | **** $p<0.0001$      |
| WM983A P1 vs. P3        | **** $p<0.0001$      |                         |                      |
| <b>Figure 1k</b>        |                      |                         |                      |
| <b>Comparison</b>       | <b>Exact p value</b> |                         |                      |
| A375P P0 vs. P3         | *** $p=0.0007$       |                         |                      |
| A375P P1 vs. P3         | * $p=0.0282$         |                         |                      |
| WM983A P0 vs. P2        | ** $p=0.0039$        |                         |                      |
| WM983A P0 vs. P3        | ** $p=0.0031$        |                         |                      |
| WM983A P1 vs. P2        | ** $p=0.0044$        |                         |                      |
| WM983A P1 vs. P3        | ** $p=0.0035$        |                         |                      |

**Figure 2c**

**Comparison A375M2**

|                 | Exact p value     |
|-----------------|-------------------|
| <i>KRT19</i>    | **** $p < 0.0001$ |
| <i>WNT11</i>    | **** $p < 0.0001$ |
| <i>RGS2</i>     | **** $p < 0.0001$ |
| <i>GSC</i>      | **** $p < 0.0001$ |
| <i>CAV2</i>     | **** $p < 0.0001$ |
| <i>SERPINE1</i> | **** $p < 0.0001$ |
| <i>SNAI1</i>    | **** $p < 0.0001$ |
| <i>CAMK2N1</i>  | **** $p < 0.0001$ |
| <i>TCF3</i>     | **** $p < 0.0001$ |
| <i>JAG1</i>     | **** $p < 0.0001$ |
| <i>NODAL</i>    | **** $p < 0.0001$ |
| <i>FOXC2</i>    | **** $p < 0.0001$ |
| <i>STEAP1</i>   | *** $p = 0.0001$  |
| <i>CTNNB1</i>   | *** $p = 0.0001$  |
| <i>ITGA5</i>    | *** $p = 0.0001$  |
| <i>MMP3</i>     | *** $p = 0.0002$  |
| <i>PLEK2</i>    | *** $p = 0.0002$  |
| <i>AHNAK</i>    | *** $p = 0.0002$  |
| <i>PDGFRB</i>   | *** $p = 0.0003$  |
| <i>VIM</i>      | *** $p = 0.0003$  |
| <i>STAT3</i>    | *** $p = 0.0004$  |
| <i>SOX10</i>    | *** $p = 0.0005$  |
| <i>WNT5B</i>    | *** $p = 0.0005$  |
| <i>TGFB3</i>    | *** $p = 0.0005$  |
| <i>TGFB1</i>    | *** $p = 0.0005$  |
| <i>IGFBP4</i>   | *** $p = 0.0006$  |
| <i>TSPAN13</i>  | *** $p = 0.0007$  |
| <i>MMP2</i>     | *** $p = 0.0009$  |
| <i>FGFBP1</i>   | ** $p = 0.0011$   |
| <i>SNAI3</i>    | ** $p = 0.0012$   |
| <i>CDH2</i>     | ** $p = 0.0013$   |
| <i>KRT7</i>     | ** $p = 0.0019$   |
| <i>IL1RN</i>    | ** $p = 0.0035$   |
| <i>TIMP1</i>    | ** $p = 0.004$    |
| <i>COL1A2</i>   | ** $p = 0.0053$   |
| <i>ZEB1</i>     | ** $p = 0.006$    |
| <i>CDH1</i>     | ** $p = 0.0064$   |
| <i>NUDT13</i>   | ** $p = 0.007$    |
| <i>SMAD2</i>    | ** $p = 0.007$    |
| <i>NOTCH1</i>   | ** $p = 0.0072$   |
| <i>TCF4</i>     | ** $p = 0.0077$   |
| <i>EGFR</i>     | ** $p = 0.0082$   |
| <i>GNG11</i>    | * $p = 0.0101$    |
| <i>VCAN</i>     | * $p = 0.0102$    |
| <i>ITGB1</i>    | * $p = 0.0105$    |
| <i>COL5A2</i>   | * $p = 0.0114$    |
| <i>ILK</i>      | * $p = 0.0115$    |
| <i>AKT1</i>     | * $p = 0.0117$    |
| <i>TFPI2</i>    | * $p = 0.0126$    |
| <i>CALD1</i>    | * $p = 0.013$     |
| <i>DES11</i>    | * $p = 0.0131$    |
| <i>GEMIN2</i>   | * $p = 0.0142$    |
| <i>OCLN</i>     | * $p = 0.0159$    |
| <i>RAC1</i>     | * $p = 0.018$     |
| <i>MSN</i>      | * $p = 0.0189$    |
| <i>F11R</i>     | * $p = 0.0208$    |
| <i>ITGAV</i>    | * $p = 0.048$     |

**Comparison WM1361**

|                 | Exact p value     |
|-----------------|-------------------|
| <i>SERPINE1</i> | **** $p < 0.0001$ |
| <i>IGFBP4</i>   | **** $p < 0.0001$ |
| <i>WNT11</i>    | **** $p < 0.0001$ |
| <i>CDH2</i>     | *** $p = 0.0002$  |
| <i>CAV2</i>     | *** $p = 0.0003$  |
| <i>TCF4</i>     | *** $p = 0.0004$  |
| <i>F11R</i>     | *** $p = 0.0008$  |
| <i>FGFBP1</i>   | ** $p = 0.0011$   |
| <i>GEMIN2</i>   | ** $p = 0.0013$   |
| <i>TIMP1</i>    | ** $p = 0.0017$   |
| <i>FN1</i>      | ** $p = 0.002$    |
| <i>DES11</i>    | ** $p = 0.0021$   |
| <i>RGS2</i>     | ** $p = 0.0023$   |
| <i>KRT7</i>     | ** $p = 0.0028$   |
| <i>PDGFRB</i>   | ** $p = 0.0031$   |
| <i>EGFR</i>     | ** $p = 0.0047$   |
| <i>DSP</i>      | ** $p = 0.0049$   |
| <i>TGFB2</i>    | ** $p = 0.007$    |
| <i>COL1A2</i>   | ** $p = 0.0098$   |
| <i>CALD1</i>    | * $p = 0.0106$    |
| <i>MSN</i>      | * $p = 0.0111$    |
| <i>MMP3</i>     | * $p = 0.0128$    |
| <i>ILK</i>      | * $p = 0.0136$    |
| <i>ITGB1</i>    | * $p = 0.0177$    |
| <i>TFPI2</i>    | * $p = 0.0181$    |
| <i>SMAD2</i>    | * $p = 0.0181$    |
| <i>SNAI2</i>    | * $p = 0.0195$    |
| <i>TCF3</i>     | * $p = 0.0222$    |
| <i>IL1RN</i>    | * $p = 0.0227$    |
| <i>TGFB1</i>    | * $p = 0.0238$    |
| <i>NODAL</i>    | * $p = 0.0239$    |
| <i>TMEFF1</i>   | * $p = 0.0239$    |
| <i>KRT14</i>    | * $p = 0.024$     |
| <i>MMP2</i>     | * $p = 0.0258$    |
| <i>NUDT13</i>   | * $p = 0.0258$    |
| <i>VIM</i>      | * $p = 0.0271$    |
| <i>ITGAV</i>    | * $p = 0.0289$    |
| <i>KRT19</i>    | * $p = 0.0337$    |
| <i>WNT5B</i>    | * $p = 0.0454$    |

**Figure 2e****Comparison**

siControl vs. siSERPINE1  
 siControl vs. siWNT11  
 siControl vs. siWNT5B  
 siControl vs. siAHNAK  
 siControl vs. siTCF4  
 siControl vs. siCAV2

**Exact p value**

\*\*\*\* $p < 0.0001$   
 \*\*\*\* $p < 0.0001$

**Figure 2g****Comparison**

siControl vs. siSERPINE1  
 siControl vs. siWNT11  
 siControl vs. siWNT5B  
 siControl vs. siCAV2

**Exact p value**

\*\*\* $p = 0.0007$   
 \* $p = 0.0387$   
 \*\* $p = 0.0076$   
 \*\*\* $p = 0.0007$

**Figure 3a****Comparison**

ALCAM  
 CD44  
 ALDH1A3  
 ALDH1A1  
 OCT4  
 JARID1B  
 SOX2

**Exact p value**

\* $p = 0.0140$   
 \* $p = 0.0249$   
 \*\*\* $p = 0.0003$   
 \*\* $p = 0.0075$   
 \* $p = 0.0437$   
 $p = 0.0712$   
 $p = 0.143$

**Figure 3c****Comparison**

Control vs. H1152  
 Control vs. GSK269962A  
 Control vs. Blebbistatin

**Exact p value**

\*\*\* $p = 0.0008$   
 \*\* $p = 0.0038$   
 \*\* $p = 0.0035$

**Figure 3e****Comparison**

A375M2 siControl vs. siROCK1/2  
 A375M2 siControl vs. siMYL9  
 A375M2 siControl vs. siMYL12B  
 WM1361 siControl vs. siROCK1/2  
 WM1361 siControl vs. siMYL9  
 WM1361 siControl vs. siMYL12B

**Exact p value**

\*\* $p = 0.007$   
 \*\* $p = 0.0031$   
 \*\* $p = 0.0036$   
 \* $p = 0.0424$   
 \*\* $p = 0.0078$   
 \*\*\* $p = 0.0003$

**Figure 3h****Comparison**

A375M2 siControl vs. siWNT5B  
 WM1361 siControl vs. siWNT5B

**Exact p value**

\*\*\* $p = 0.0003$   
 \*\* $p = 0.0012$

**Figure 4a****Comparison**

A375M2 vs  
 FZD7  
 RYK  
 FZD3  
 FZD6  
 FZD1  
 ROR2  
 FZD2  
 FZD9

**Exact p value**

A375P  
 \* $p = 0.0320$   
 ns  
 ns  
 \*\*\* $p = 0.0006$   
 \*\*\* $p = 0.0008$   
 ns  
 ns  
 ns

**Exact p value**

H1152  
 \* $p = 0.0190$   
 \*\* $p = 0.0013$   
 ns  
 \*\*\* $p = 0.0010$   
 \* $p = 0.0102$   
 ns  
 ns  
 ns

**Exact p value**

Y27632  
 \* $p = 0.0314$   
 \*\*\* $p = 0.0004$   
 ns  
 \*\* $p = 0.0030$   
 \*\* $p = 0.0070$   
 ns  
 \* $p = 0.0145$   
 ns

**Exact p value**

Blebbistatin  
 ns  
 \* $p = 0.0395$   
 ns  
 \*\* $p = 0.0041$   
 \*\* $p = 0.0078$   
 \* $p = 0.0148$   
 \*\* $p = 0.0019$   
 ns

**Figure 2f****Comparison**

siControl vs. siSERPINE1  
 siControl vs. siWNT11  
 siControl vs. siWNT5B  
 siControl vs. siAHNAK  
 siControl vs. siTCF4

**Exact p value**

\*\*\*\* $p < 0.0001$   
 \*\*\*\* $p < 0.0001$   
 \* $p = 0.0012$   
 \*\*\*\* $p < 0.0001$   
 \*\*\*\* $p < 0.0001$

**Figure 2h****Comparison**

siControl vs. siSERPINE1  
 siControl vs. siWNT11  
 siControl vs. siWNT5B  
 siControl vs. siAHNAK

**Exact p value**

\*\*\* $p = 0.0001$   
 \*\*\* $p = 0.0003$   
 \*\*\* $p = 0.0003$   
 \*\*\* $p = 0.0003$

**Figure 3b****Comparison**

Control vs. H1152  
 Control vs. GSK269962A  
 Control vs. Blebbistatin

**Exact p value**

\* $p = 0.0159$   
 \*\* $p = 0.0002$   
 \*\*\* $p = 0.0004$

**Figure 3d****Comparison**

A375M2 siControl vs. siROCK1/2  
 A375M2 siControl vs. siMYL9  
 A375M2 siControl vs. siMYL12B  
 WM1361 siControl vs. siROCK1/2  
 WM1361 siControl vs. siMYL9  
 WM1361 siControl vs. siMYL12B

**Exact p value**

\*\* $p = 0.0074$   
 \*\* $p = 0.0016$   
 \*\*\* $p = 0.0008$   
 \*\*\* $p = 0.0005$   
 \*\*\*\* $p < 0.0001$   
 \*\*\*\* $p < 0.0001$

**Figure 3g****Comparison**

A375M2 siControl vs. siWNT11#1  
 A375M2 siControl vs. siWNT11#2  
 A375M2 siControl vs. siWNT11#3  
 WM1361 siControl vs. siWNT11#1  
 WM1361 siControl vs. siWNT11#2  
 WM1361 siControl vs. siWNT11#3

**Exact p value**

\* $p = 0.0131$   
 \*\* $p = 0.0056$   
 \*\* $p = 0.0068$   
 \*\*\* $p = 0.0002$   
 \*\*\* $p = 0.0002$   
 \*\*\*\* $p < 0.0001$

**Figure 4b**

| Comparison            | Exact p value   | Exact p value | Exact p value   | Exact p value  |
|-----------------------|-----------------|---------------|-----------------|----------------|
| Metastasis vs Primary | Xu              | Riker         | Kabbarah        | TCGA           |
| <i>FZD7</i>           | * $p=0.0141$    | * $p=0.0232$  | * $p=0.0251$    | ns             |
| <i>RYK</i>            | **** $p<0.0001$ | ns            | * $p=0.0172$    | * $p=0.0131$   |
| <i>FZD3</i>           | *** $p=0.0001$  | ns            | **** $p<0.0001$ | ns             |
| <i>FZD6</i>           | ** $p=0.0011$   | ns            | ns              | ns             |
| <i>FZD1</i>           | ns              | ns            | * $p=0.0262$    | *** $p=0.0004$ |
| <i>ROR2</i>           | ns              | ns            | *** $p=0.0007$  | ns             |
| <i>FZD2</i>           | ns              | ns            | ns              | ns             |
| <i>FZD9</i>           | ns              | ns            | ns              | * $p=0.0124$   |

**Figure 4c**

| Comparison                          | Exact p value  |
|-------------------------------------|----------------|
| A375M2 siControl vs. si <i>FZD7</i> | ** $p=0.0022$  |
| WM1361 siControl vs. si <i>FZD7</i> | *** $p=0.0004$ |
| WM1361 siControl vs. si <i>RYK</i>  | ** $p=0.0054$  |

**Figure 4f**

| Comparison                          | Exact p value   |
|-------------------------------------|-----------------|
| A375M2 siControl vs. si <i>FZD7</i> | * $p=0.0441$    |
| A375M2 siControl vs. si <i>RYK</i>  | * $p=0.0403$    |
| WM1361 siControl vs. si <i>FZD7</i> | *** $p=0.0001$  |
| WM1361 siControl vs. si <i>RYK</i>  | **** $p<0.0001$ |

**Figure 4h**

| Comparison                           | Exact p value   |
|--------------------------------------|-----------------|
| A375M2 siControl vs. si <i>PLCB1</i> | **** $p<0.0001$ |
| A375M2 siControl vs. si <i>DAAMI</i> | **** $p<0.0001$ |
| WM1361 siControl vs. si <i>PLCB1</i> | *** $p=0.0002$  |
| WM1361 siControl vs. si <i>DAAMI</i> | **** $p<0.0001$ |

**Figure 4k**

| Comparison                           | Exact p value  |
|--------------------------------------|----------------|
| A375M2 siControl vs. si <i>DAAMI</i> | ** $p=0.0015$  |
| WM1361 siControl vs. si <i>DAAMI</i> | *** $p=0.0004$ |

**Figure 4m**

| Comparison                    | Exact p value |
|-------------------------------|---------------|
| siControl vs. siControl+WNT11 | * $p=0.0462$  |

**Figure 5a**

| Comparison             | Exact p value |
|------------------------|---------------|
| Control vs. GSK269962A | ** $p=0.0092$ |
| Control vs. H1152      | ** $p=0.0019$ |

**Figure 5c**

| Comparison             | Exact p value |
|------------------------|---------------|
| Control vs. GSK269962A | ** $p=0.0019$ |
| Control vs. H1152      | ** $p=0.0013$ |

**Figure 5f**

| Comparison                              | Exact p value   |
|-----------------------------------------|-----------------|
| shControl TB vs. shControl IF           | *** $p=0.0003$  |
| shControl TB vs. sh <i>FZD7</i> TB      | **** $p<0.0001$ |
| shControl IF vs. sh <i>FZD7</i> IF      | **** $p<0.0001$ |
| sh <i>FZD7</i> TB vs. sh <i>FZD7</i> IF | * $p=0.0196$    |

**Figure 4e**

| Comparison                          | Exact p value   |
|-------------------------------------|-----------------|
| A375M2 siControl vs. si <i>FZD7</i> | **** $p<0.0001$ |
| A375M2 siControl vs. si <i>RYK</i>  | **** $p<0.0001$ |
| WM1361 siControl vs. si <i>FZD7</i> | **** $p<0.0001$ |
| WM1361 siControl vs. si <i>RYK</i>  | *** $p=0.0001$  |

**Figure 4g**

| Comparison                          | Exact p value  |
|-------------------------------------|----------------|
| A375M2 siControl vs. si <i>FZD7</i> | *** $p=0.0006$ |
| WM1361 siControl vs. si <i>FZD7</i> | * $p=0.0259$   |

**Figure 4i**

| Comparison                           | Exact p value   |
|--------------------------------------|-----------------|
| A375M2 siControl vs. si <i>DAAMI</i> | ** $p=0.0047$   |
| WM1361 siControl vs. si <i>PLCB1</i> | ** $p=0.0093$   |
| WM1361 siControl vs. si <i>DAAMI</i> | **** $p<0.0001$ |

**Figure 4l**

| Comparison                                 | Exact p value   |
|--------------------------------------------|-----------------|
| siControl vs. siControl+WNT11              | **** $p<0.0001$ |
| si <i>PLCB1</i> vs. si <i>PLCB1</i> +WNT11 | **** $p<0.0001$ |
| siControl vs. si <i>PLCB1</i>              | ** $p=0.005$    |
| siControl vs. si <i>DAAMI</i>              | ** $p=0.0012$   |

**Figure 4n**

| Comparison                    | Exact p value |
|-------------------------------|---------------|
| siControl vs. siControl+WNT11 | * $p=0.0112$  |

**Figure 5b**

| Comparison             | Exact p value |
|------------------------|---------------|
| Control vs. GSK269962A | * $p=0.0141$  |
| Control vs. H1152      | ** $p=0.0063$ |

**Figure 5d**

| Comparison             | Exact p value  |
|------------------------|----------------|
| Control vs. GSK269962A | ** $p=0.0055$  |
| Control vs. H1152      | *** $p=0.0004$ |

**Figure 5g**

| Comparison                         | Exact p value   |
|------------------------------------|-----------------|
| shControl TB vs. shControl IF      | **** $p<0.0001$ |
| shControl TB vs. sh <i>FZD7</i> TB | **** $p<0.0001$ |
| shControl IF vs. sh <i>FZD7</i> IF | **** $p<0.0001$ |

**Figure 5h****Comparison**

shControl TB vs. shControl IF  
shControl TB vs. shFZD7 TB  
shControl IF vs. shFZD7 IF

**Exact p value**

\*\*\* $p=0.0001$   
\*\*\* $p<0.0001$   
\*\*\* $p<0.0001$

**Figure 5k****Comparison**

shControl TB vs. shControl IF  
shControl TB vs. shDAAMI TB  
shControl IF vs. shDAAMI IF

**Exact p value**

\*\*\* $p<0.0001$   
\*\* $p=0.0011$   
\*\*\* $p<0.0001$

**Figure 5m****Comparison**

24 h shControl vs. shDAAMI  
3 weeks shControl vs. shDAAMI

**Exact p value**

\*\*\* $p=0.0001$   
\* $p=0.0177$

**Figure 6d****Comparison**

Control TB vs. Control IF  
Control TB vs. Control DIF  
Control IF vs. Control DIF  
Control IF vs. ROCKi IF  
Control DIF vs. ROCKi DIF  
ROCKi TB vs. ROCKi IF  
ROCKi TB vs. ROCKi DIF  
ROCKi IF vs. ROCKi DIF

**Exact p value**

\*\*\* $p=0.0002$   
\*\*\* $p<0.0001$   
\*\*\* $p<0.0001$   
\*\* $p=0.0064$   
\*\* $p=0.0095$   
\* $p=0.0198$   
\*\*\* $p<0.0001$   
\*\*\* $p<0.0001$

**Figure 6e****Comparison**

Control TB vs. Control IF  
Control TB vs. Control DIF  
Control IF vs. Control DIF  
Control DIF vs. ROCKi DIF  
ROCKi TB vs. ROCKi DIF  
ROCKi IF vs. ROCKi DIF

**Exact p value**

\* $p=0.0139$   
\*\*\* $p<0.0001$   
\*\*\* $p=0.0002$   
\*\* $p=0.0029$   
\*\* $p=0.0019$   
\* $p=0.0139$

**Figure 6j Comparison**

Control vs. ROCKi

**Exact p value**

\* $p=0.0107$

**Figure 6l Comparison**

Control vs. ROCKi

**Exact p value**

\*\* $p=0.0022$

**Supplementary Figure 1a****Comparison**

A375M2 TB vs. A375M2 IF  
A375M2 IF vs. A375P IF

**Exact p value**

\*\*\* $p<0.0001$   
\*\*\* $p=0.0001$

**Supplementary Figure 1e****Comparison**

A375M2 P1 vs. P4  
A375M2 P2 vs. P4  
A375M2 P3 vs. P4  
WM983B P1 vs. P4

**Exact p value**

\*\*\* $p=0.0005$   
\*\*\* $p=0.001$   
\*\* $p=0.01$   
\* $p=0.0296$

**Figure 5j****Comparison**

shControl TB vs. shControl IF  
shControl TB vs. shDAAMI TB  
shControl IF vs. shDAAMI IF  
shDAAMI TB vs. shDAAMI IF

**Exact p value**

\*\*\* $p<0.0001$   
\*\*\* $p<0.0001$   
\*\*\* $p<0.0001$   
\* $p=0.0289$

**Figure 5l****Comparison**

shControl TB vs. shControl IF  
shControl TB vs. shDAAMI TB  
shControl IF vs. shDAAMI IF

**Exact p value**

\*\* $p=0.0069$   
\*\* $p=0.0058$   
\*\*\* $p=0.0009$

**Figure 6e****Comparison**

Control TB vs. Control IF  
Control TB vs. Control DIF  
Control IF vs. Control DIF  
Control IF vs. ROCKi IF  
Control DIF vs. ROCKi DIF  
ROCKi TB vs. ROCKi IF  
ROCKi TB vs. ROCKi DIF  
ROCKi IF vs. ROCKi DIF

**Exact p value**

\*\*\* $p<0.0001$   
\*\*\* $p<0.0001$   
\*\* $p=0.0038$   
\*\* $p=0.002$   
\*\* $p=0.0036$   
\*\* $p=0.0027$   
\*\*\* $p<0.0001$   
\*\* $p=0.0036$

**Figure 6f****Comparison**

Control TB vs. Control IF  
Control TB vs. Control DIF  
Control IF vs. Control DIF  
Control TB vs. ROCKi TB  
Control IF vs. ROCKi IF  
Control DIF vs. ROCKi DIF  
ROCKi TB vs. ROCKi IF  
ROCKi TB vs. ROCKi DIF  
ROCKi IF vs. ROCKi DIF

**Exact p value**

\* $p=0.0243$   
\*\*\* $p<0.0001$   
\*\* $p=0.0016$   
\*\*\* $p=0.0007$   
\*\* $p=0.0016$   
\* $p=0.0452$   
\* $p=0.0167$   
\*\*\* $p<0.0001$   
\*\*\* $p=0.0001$

**Figure 6k Comparison**

Control vs. ROCKi

**Exact p value**

\* $p=0.0317$

**Figure 6m Comparison**

Control vs. ROCKi

**Exact p value**

\* $p=0.0411$

**Supplementary Figure 1c****Comparison**

A375M2 TB vs. A375M2 IF  
A375M2 TB vs. A375P TB  
A375M2 IF vs. A375P IF  
A375P TB vs. A375P IF

**Exact p value**

\*\*\* $p<0.0001$   
\*\*\* $p<0.0001$   
\*\*\* $p<0.0001$   
\*\*\* $p<0.0001$

**Supplementary Figure 1f****Comparison**

A375M2 P1 vs. P3  
A375M2 P1 vs. P4  
A375M2 P2 vs. P4  
WM983B P1 vs. P3  
WM983B P1 vs. P4  
WM983B P2 vs. P3  
WM983B P2 vs. P4

**Exact p value**

\*\* $p=0.0087$   
\*\*\* $p=0.0002$   
\*\* $p=0.0026$   
\*\* $p=0.0011$   
\*\*\* $p<0.0001$   
\* $p=0.0144$   
\*\*\* $p=0.0006$

**Supplementary Figure 1g  
Comparison**

A375M2 P1 vs. P3  
A375M2 P1 vs. P4  
A375M2 P2 vs. P3  
A375M2 P2 vs. P4  
WM983B P1 vs. P3  
WM983B P1 vs. P4  
WM983B P2 vs. P4

**Exact p value**

\*\*\* $p=0.0002$   
\*\*\* $p<0.0001$   
 $p=0.0245$   
\*\*\* $p=0.0008$   
\*\* $p=0.0044$   
\*\*\* $p=0.0002$   
\*\* $p=0.0096$

**Supplementary Figure 1i  
Comparison**

A375M2 P0 vs. P1  
A375M2 P0 vs. P2  
A375M2 P0 vs. P3  
WM983B P0 vs. P1  
WM983B P0 vs. P2  
WM983B P0 vs. P3  
WM983B P1 vs. P3  
WM983B P2 vs. P3

**Exact p value**

\*\*\* $p<0.0001$   
\*\* $p=0.0013$   
\*\*\* $p<0.0001$   
 $p=0.0101$   
\*\* $p=0.0016$   
\*\*\* $p<0.0001$   
\*\*\* $p<0.0001$   
\*\*\* $p<0.0001$

**Supplementary Figure 1n  
Comparison**

GFP vs. MLC-GFP

**Exact p value**

\*\*\* $p=0.0007$

**Supplementary Figure 2d  
Comparison**

A375M2 siControl vs. siWNT11#1  
A375M2 siControl vs. siWNT11#2  
A375M2 siControl vs. siWNT11#3  
WM1361 siControl vs. siWNT11#1  
WM1361 siControl vs. siWNT11#2  
WM1361 siControl vs. siWNT11#3

**Exact p value**

\*\*\* $p=0.0006$   
\*\*\* $p=0.0006$   
\*\* $p=0.0055$   
\*\* $p=0.0043$   
\*\* $p=0.0092$   
\*\* $p=0.0066$

**Supplementary Figure 2g  
Comparison**

A375M2 siControl vs. siWNT11#1  
A375M2 siControl vs. siWNT11#2  
A375M2 siControl vs. siWNT11#3  
WM1361 siControl vs. siWNT11#1  
WM1361 siControl vs. siWNT11#2  
WM1361 siControl vs. siWNT11#3

**Exact p value**

\*\* $p=0.0035$   
 $p=0.0153$   
 $p=0.0276$   
 $p=0.0458$   
 $p=0.0289$   
 $p=0.0498$

**Supplementary Figure 3a  
Comparison**

JARID1B  
ALDH1A3  
SOX2  
CD44  
OCT4  
ALCAM  
ALDH1A1

**Exact p value**

\*\*\* $p=0.0005$   
\*\* $p=0.0025$   
 $p=0.0559$   
\*\* $p=0.0046$   
 $p=0.1202$   
 $p=0.557$   
 $p=0.616$

**Supplementary Figure 4c  
Comparison**

A375M2 shControl vs. shFZD7#1  
A375M2 shControl vs. shFZD7#2  
WM1361 shControl vs. shFZD7#1  
WM1361 shControl vs. shFZD7#2

**Exact p value**

\*\*\* $p<0.0001$   
\*\*\* $p<0.0001$   
\*\* $p=0.0011$   
\*\* $p=0.0073$

**Supplementary Figure 1h  
Comparison**

A375M2 P0 vs. P3  
A375M2 P1 vs. P3  
WM983B P0 vs. P1  
WM983B P0 vs. P2  
WM983B P0 vs. P3

**Exact p value**

\*\*\* $p=0.0001$   
 $p=0.0274$   
\*\* $p=0.0054$   
 $p=0.0377$   
\*\*\* $p=0.0002$

**Supplementary Figure 1j  
Comparison**

A375M2 P0 vs. P3  
A375M2 P1 vs. P3  
WM983B P0 vs. P3  
WM983B P1 vs. P3

**Exact p value**

\*\* $p=0.0096$   
\*\* $p=0.0022$   
\*\*\* $p=0.0003$   
\*\*\* $p=0.0002$

**Supplementary Figure 1m  
Comparison**

GFP vs. MLC-GFP

**Exact p value**

\*\* $p=0.0016$

**Supplementary Figure 1o  
Comparison**

GFP vs. MLC-GFP

**Exact p value**

\*\* $p=0.0044$

**Supplementary Figure 2f  
Comparison**

A375M2 siControl vs. siWNT11#1  
A375M2 siControl vs. siWNT11#2  
A375M2 siControl vs. siWNT11#3  
WM1361 siControl vs. siWNT11#1  
WM1361 siControl vs. siWNT11#2  
WM1361 siControl vs. siWNT11#3

**Exact p value**

$p=0.0391$   
 $p=0.0115$   
 $p=0.0109$   
 $p=0.0113$   
\*\* $p=0.0014$   
\*\* $p=0.0024$

**Supplementary Figure 2h  
Comparison**

siControl vs. siWNT5B

**Exact p value**

\*\* $p=0.0035$

**Supplementary Figure 3d  
Comparison**

WM1361 Control vs. GSK  
WM983B Control vs. GSK

**Exact p value**

\*\* $p=0.0013$   
\*\* $p=0.0034$

**Supplementary Figure 3e  
Comparison**

WM1361 Control vs. GSK  
WM983B Control vs. GSK

**Exact p value**

\*\*\* $p<0.0001$   
 $p=0.0303$

**Supplementary Figure 4d  
Comparison**

A375M2 shControl vs. shFZD7#1  
A375M2 shControl vs. shFZD7#2  
WM1361 shControl vs. shFZD7#1  
WM1361 shControl vs. shFZD7#2

**Exact p value**

\*\* $p=0.0033$   
\*\* $p=0.0046$   
\*\* $p=0.0067$   
\*\* $p=0.0061$

|                                           |                      |                                           |                      |                      |
|-------------------------------------------|----------------------|-------------------------------------------|----------------------|----------------------|
| <b>Supplementary Figure 4h</b>            |                      |                                           |                      |                      |
| <b>Comparison</b>                         | <b>Exact p value</b> | <b>Exact p value</b>                      | <b>Exact p value</b> | <b>Exact p value</b> |
| Metastasis vs Primary                     | Xu                   | Riker                                     | Kabbarah             | TCGA                 |
| <i>PLCB1</i>                              | *** $p=0.0002$       | ns                                        | *** $p=0.0002$       | * $p=0.0312$         |
| <i>PLCB2</i>                              | ns                   | ns                                        | * $p=0.0209$         | *** $p<0.0001$       |
| <i>PLCB3</i>                              | ns                   | * $p=0.0323$                              | ns                   | ns                   |
| <i>PLCB4</i>                              | ns                   | ns                                        | * $p=0.0115$         | *** $p<0.0001$       |
| <b>Supplementary Figure 4i</b>            |                      | <b>Supplementary Figure 4j</b>            |                      |                      |
| <b>Comparison</b>                         | <b>Exact p value</b> | <b>Comparison</b>                         |                      | <b>Exact p value</b> |
| A375M2 siControl vs. si <i>PLCB1</i>      | *** $p<0.0001$       | A375M2 shControl vs. sh <i>DAAMI#1</i>    |                      | ** $p=0.0047$        |
| A375M2 siControl vs. si <i>DAAMI</i>      | *** $p<0.0001$       | A375M2 shControl vs. sh <i>DAAMI#2</i>    |                      | * $p=0.0308$         |
| WM1361 siControl vs. si <i>PLCB1</i>      | *** $p<0.0001$       | WM1361 shControl vs. sh <i>DAAMI#1</i>    |                      | *** $p<0.0001$       |
| WM1361 siControl vs. si <i>DAAMI</i>      | *** $p=0.001$        | WM1361 shControl vs. sh <i>DAAMI#2</i>    |                      | *** $p=0.0004$       |
| <b>Supplementary Figure 4n</b>            |                      | <b>Supplementary Figure 4p</b>            |                      |                      |
| <b>Comparison</b>                         | <b>Exact p value</b> | <b>Comparison</b>                         |                      | <b>Exact p value</b> |
| A375M2 shControl vs. sh <i>DAAMI#1</i>    | *** $p=0.0002$       | <i>NANOG</i>                              |                      | ** $p=0.0026$        |
| A375M2 shControl vs. sh <i>DAAMI#2</i>    | *** $p<0.0001$       | <i>OCT4</i>                               |                      | * $p=0.0105$         |
| WM1361 shControl vs. sh <i>DAAMI#1</i>    | *** $p<0.0001$       | <i>SOX2</i>                               |                      | ** $p=0.0046$        |
| WM1361 shControl vs. sh <i>DAAMI#2</i>    | *** $p<0.0001$       | <i>CD44</i>                               |                      | * $p=0.0205$         |
|                                           |                      | <i>ALCAM</i>                              |                      | ** $p=0.0011$        |
|                                           |                      | <i>JARID1B</i>                            |                      | $p=0.0716$           |
|                                           |                      | <i>ALDH1A1</i>                            |                      | $p=0.1855$           |
|                                           |                      | <i>ALDH1A3</i>                            |                      | $p=0.3215$           |
| <b>Supplementary Figure 5d</b>            |                      | <b>Supplementary Figure 5e</b>            |                      |                      |
| <b>Comparison</b>                         | <b>Exact p value</b> | <b>Comparison</b>                         |                      | <b>Exact p value</b> |
| Control vs. GSK269962A 5 $\mu$ M          | *** $p=0.0003$       | Control vs. GSK269962A                    |                      | ** $p=0.0044$        |
| Control vs. GSK269962A 1 $\mu$ M          | * $p=0.0343$         |                                           |                      |                      |
| <b>Supplementary Figure 5f</b>            |                      | <b>Supplementary Figure 5g</b>            |                      |                      |
| <b>Comparison</b>                         | <b>Exact p value</b> | <b>Comparison</b>                         |                      | <b>Exact p value</b> |
| Control vs. GSK269962A                    | *** $p=0.0008$       | Control vs. GSK269962A                    |                      | ** $p=0.0076$        |
| <b>Supplementary Figure 5j</b>            |                      | <b>Supplementary Figure 5m</b>            |                      |                      |
| <b>Comparison</b>                         | <b>Exact p value</b> | <b>Comparison</b>                         |                      | <b>Exact p value</b> |
| shControl vs. sh <i>DAAMI</i>             | *** $p=0.0007$       | shControl TB vs. shControl IF             |                      | *** $p<0.0001$       |
|                                           |                      | shControl TB vs. sh <i>DAAMI</i> TB       |                      | * $p=0.0124$         |
|                                           |                      | shControl IF vs. sh <i>DAAMI</i> IF       |                      | * $p=0.0228$         |
|                                           |                      | sh <i>DAAMI</i> TB vs. sh <i>DAAMI</i> IF |                      | *** $p<0.0001$       |
| <b>Supplementary Figure 5n left</b>       |                      | <b>Supplementary Figure 5n right</b>      |                      |                      |
| <b>Comparison</b>                         | <b>Exact p value</b> | <b>Comparison</b>                         |                      | <b>Exact p value</b> |
| shControl TB vs. shControl IF             | *** $p<0.0001$       | shControl TB vs. shControl IF             |                      | *** $p<0.0001$       |
| shControl TB vs. sh <i>DAAMI</i> TB       | * $p=0.0137$         | shControl IF vs. sh <i>DAAMI</i> IF       |                      | ** $p=0.0003$        |
| shControl IF vs. sh <i>DAAMI</i> IF       | *** $p=0.0003$       |                                           |                      |                      |
| sh <i>DAAMI</i> TB vs. sh <i>DAAMI</i> IF | *** $p=0.0004$       |                                           |                      |                      |
| <b>Supplementary Figure 5o</b>            |                      | <b>Supplementary Figure 7f</b>            |                      |                      |
| <b>Comparison</b>                         | <b>Exact p value</b> | <b>Comparison</b>                         |                      | <b>Exact p value</b> |
| shControl TB vs. shControl IF             | *** $p<0.0001$       | A375M2 siControl vs. si <i>ALDH1A1</i>    |                      | *** $p<0.0001$       |
| shControl TB vs. sh <i>DAAMI</i> TB       | *** $p=0.0008$       | WM1361 siControl vs. si <i>ALDH1A1</i>    |                      | * $p=0.0230$         |
| shControl IF vs. sh <i>DAAMI</i> IF       | *** $p<0.0001$       |                                           |                      |                      |
| sh <i>DAAMI</i> TB vs. sh <i>DAAMI</i> IF | *** $p=0.0009$       |                                           |                      |                      |
| <b>Supplementary Figure 7g</b>            |                      | <b>Supplementary Figure 7j</b>            |                      |                      |
| <b>Comparison</b>                         | <b>Exact p value</b> | <b>Comparison</b>                         |                      | <b>Exact p value</b> |
| A375M2 siControl vs. si <i>ALDH1A1</i>    | *** $p<0.0001$       | A375M2 siControl vs. si <i>ALDH1A1</i>    |                      | * $p=0.0248$         |
| WM1361 siControl vs. si <i>ALDH1A1</i>    | ** $p=0.0082$        | WM1361 siControl vs. si <i>ALDH1A1</i>    |                      | * $p=0.0411$         |

**Supplementary Table 2. Clinical information for primary melanoma patients**

| Patients (n = 53)                            |               |
|----------------------------------------------|---------------|
| <b>Age, years (mean <math>\pm</math> SD)</b> | 65 $\pm$ 17.5 |
| <b>Gender</b>                                |               |
| Male                                         | 30 (56.6%)    |
| Female                                       | 23 (43.4%)    |
| <b>Stage</b>                                 |               |
| II                                           | 13 (24.5%)    |
| III                                          | 31 (58.5%)    |
| IV                                           | 6 (11.3%)     |
| n.a.                                         | 3 (5.7%)      |
| <b>Location</b>                              |               |
| Trunk                                        | 23 (43.4%)    |
| Head and Neck                                | 15 (28.3%)    |
| Lower Limb                                   | 8 (15.1%)     |
| Upper Limb                                   | 5 (9.4%)      |
| Foot                                         | 2 (3.8%)      |



**Supplementary Table 3. Clinical information for metastatic melanoma patients**

| Patients (n = 45)                            |               |
|----------------------------------------------|---------------|
| <b>Age, years (mean <math>\pm</math> SD)</b> | 63 $\pm$ 16.3 |
| <b>Gender</b>                                |               |
| Male                                         | 26 (57.8%)    |
| Female                                       | 19 (42.2%)    |
| <b>Location</b>                              |               |
| Lymph Node                                   | 39 (86.7%)    |
| Cutaneous/ subcutaneous                      | 5 (11.1%)     |
| Lung                                         | 1 (2.2%)      |

**Supplementary Table 4. List of siRNA sequences.**

| Target                                                                       | siRNA sequence                                                                                                                                                                                                                                              |
|------------------------------------------------------------------------------|-------------------------------------------------------------------------------------------------------------------------------------------------------------------------------------------------------------------------------------------------------------|
| Control siRNA (siGenome Non-Targeting siRNA #5 or OT non-targeting siRNA #1) | 5'-UGGUUUACAUGUCGACUAA-3'                                                                                                                                                                                                                                   |
| <i>SERPINE1</i>                                                              | siGENOME SMARTpool:<br>5'-GCUAUGGGGAUUCAAGAUUG-3'<br>5'-GGAGCACGGUCAAGCAAGU-3'<br>5'-CUAGAGAACCUGGGAAUGA-3'<br>5'-CGACAUGUUCAGACAGUUU-3'                                                                                                                    |
| <i>WNT11</i>                                                                 | #1: siGENOME SMARTpool:<br>5'-CAGGAUCCCAAGCCAAUAA-3'<br>5'-CGACAGCUGCGACCUUAUG-3'<br>5'-GUCGAGCGGUGCCACUGUA-3'<br>5'-GGACUCGGAACUCGUCUAU-3'<br>ON-TARGETplus individual sequences:<br>#2 OT6: 5'-GCGCUAUGUCUGCAAGUGA-3'<br>#3 OT7: 5'-ACAAGACAUCCAACGGAA-3' |
| <i>WNT5B</i>                                                                 | siGENOME SMARTpool:<br>5'-GCAGGGCUGUGUAUAAGAU-3'<br>5'-AGAGGAAGCUGUGCCAAUU-3'<br>5'-GACCCGAGAUGUUUAUCAU-3'<br>5'-AGACGUAGCCUGCAAUUGC-3'                                                                                                                     |
| <i>AHNAK</i>                                                                 | siGENOME SMARTpool:<br>5'-GCCUGAAGCUGCACC GCAA-3'<br>5'-GGGACCAGAUUGUGGGUGC-3'<br>5'-GCGUCUUUGUGCAGGAGGU-3'<br>5'-UGACCAUCGCCAGAGGGA-3'                                                                                                                     |
| <i>TCF4</i>                                                                  | siGENOME SMARTpool:<br>5'-GAAAUUAGAUGACGACAAG-3'<br>5'-ACAAAGAGCUGAGUGAUUU-3'<br>5'-GGGCAACUCUUCUCAUAUU-3'<br>5'-GCACUUGCUUCGAUCUAUU-3'                                                                                                                     |
| <i>CAV2</i>                                                                  | siGENOME SMARTpool:<br>5'-GUAAAAGACCUGCCUAAUGG-3'<br>5'-UAUCAUUGCUCCAUUGUGU-3'<br>5'-GGACGUACAGCUCUUCAUG-3'<br>5'-CGGCUCAACUCGCAUCUCA-3'                                                                                                                    |
| <i>ROCK1</i>                                                                 | ON-TARGETplus individual sequence:<br>OT8: 5'-CCAGGAAGGUUAUUGCUAU-3'                                                                                                                                                                                        |
| <i>ROCK2</i>                                                                 | ON-TARGETplus individual sequence:<br>OT8: 5'-GAAACUAAUAGGACACUAA-3'                                                                                                                                                                                        |
| <i>MYL9</i>                                                                  | ON-TARGETplus individual sequence:<br>OT5: 5'-CCAAGGAUAAAGACGACUA-3'                                                                                                                                                                                        |
| <i>MYL12B</i>                                                                | ON-TARGETplus SMARTpool:<br>5'-CCACUUAGCACUUGUAUAA-3'<br>5'-GGGUGUAAAUUGUAUUGAA-3'<br>5'-CCUCAUAGAACCUGUUGCA-3'<br>5'-UGUAUUUAUUCAGACCUU-3'                                                                                                                 |
| <i>FZD7</i>                                                                  | siGENOME SMARTpool:<br>5'-UCAAGUACCUGAUGACCAU-3'<br>5'-GUUCGUCUACCUCUUCAUA-3'<br>5'-CAUAGGCACGUCCUUCUUG-3'<br>5'-UGAUGUACUUUAAGGAGGA-3'                                                                                                                     |
| <i>RYK</i>                                                                   | siGENOME SMARTpool:<br>5'-GAAAGAUGGUUACCGAAUA-3'<br>5'-GGUGAAGGAUUAAGCAAUA-3'<br>5'-CGAAGUCCAAGGUUGAAUA-3'<br>5'-AGUAAUAAUUCUCGUAGCA-3'                                                                                                                     |
| <i>PLCB1</i>                                                                 | siGENOME SMARTpool:<br>5'-CAACAGAAAUCGUUUGUGA-3'<br>5'-GAUGAUGACUCAACUAUUG-3'<br>5'-GCAAUUGGCUGCUUUGACA-3'<br>5'-GAAGAUAAACAGAAGCUAAA-3'                                                                                                                    |
| <i>DAAMI</i>                                                                 | siGENOME SMARTpool:<br>5'-GAGAUAAAGUUUGUGUCUGU-3'<br>5'-GUACGAAUGUUGGUUAAUG-3'<br>5'-CGGAAUCGCAAACGUAAUA-3'<br>5'-GAGCCGAUUAAUCACUAU-3'                                                                                                                     |
| <i>ALDH1A1</i>                                                               | siGENOME SMARTpool:<br>5'-GGACAAUGCUGUUGAAUUU-3'<br>5'-GCACUGAGCUGUGGAAACA-3'<br>5'-CCACGUGGCAUCUUUAAUA-3'<br>5'-GAACAGUGUGGGUGAAUUG-3'                                                                                                                     |

**Supplementary Table 5. Detailed information about immunohistochemical stainings**

| Antibody             | Antibody #Catalog             | Clone      | Primary antibody conditions                 | Antigen Retrieval                           | Detection Method #Catalog                                                                  |
|----------------------|-------------------------------|------------|---------------------------------------------|---------------------------------------------|--------------------------------------------------------------------------------------------|
| <b>p-MLC2</b>        | Cell Signaling #3671          | Polyclonal | Rabbit, 1:50, 40 min, Room Temperature (RT) | 10 min at 100°C, pH 6 Citrate Buffer H-3300 | VECTASTAIN® ABC HRP Kit #PK-4000                                                           |
| <b>mCherry</b>       | Abcam #ab167453               | Polyclonal | Rabbit, 1:500, 20 min, RT                   | 10 min at 100°C, pH 9 Tris Buffer H-3301    | VECTASTAIN® ABC HRP Kit #PK-4000                                                           |
| <b>DAAMI</b>         | Abcam #ab71327                | Polyclonal | Rabbit, 1:300, 40 min, RT                   | 10 min at 100°C, pH 6 Citrate Buffer H-3300 | VECTASTAIN® ABC HRP Kit #PK-4000                                                           |
| <b>WNT11</b>         | Novus Biologicals #NBPI-31406 | Polyclonal | Rabbit, 1:200, 20 min, RT                   | 10 min at 100°C, pH 9 Tris Buffer H-3301    | EnVision Detection Systems Peroxidase/DAB, Rabbit/Mouse, HRP. Rabbit/Mouse (DAB+) #K500711 |
| <b>WNT5B</b>         | Abcam #ab115563               | Polyclonal | Rabbit, 1:200, 20 min, RT                   | 10 min at 100°C, pH 9 Tris Buffer H-3301    | EnVision Detection Systems Peroxidase/DAB, Rabbit/Mouse, HRP. Rabbit/Mouse (DAB+) #K500711 |
| <b>ALDH1A1</b>       | BD Biosciences #611194        | 44/ALDH    | Mouse, 1:100, 20 min, RT                    | 10 min at 100°C, pH 6 Citrate Buffer H-3300 | EnVision Detection Systems Peroxidase/DAB, Rabbit/Mouse, HRP. Rabbit/Mouse (DAB+) #K500711 |
| <b>CD44</b>          | Thermo Fisher #MA1-10225      | IM7        | Rat, 1:400, 40 min, RT                      | 10 min at 100°C, pH 6 Citrate Buffer H-3300 | VECTASTAIN® ABC HRP Kit #PK-4000                                                           |
| <b>NANOG</b>         | Abcam #ab80892                | Polyclonal | Rabbit, 1:100, 30 min, RT                   | 10 min at 100°C, pH 9 Tris Buffer H-3301    | EnVision Detection Systems Peroxidase/DAB, Rabbit/Mouse, HRP. Rabbit/Mouse (DAB+) #K500711 |
| <b>ALDH1A3</b>       | Novus Biologicals #NBP2-15339 | Polyclonal | Rabbit, 1:200, 20 min, RT                   | 10 min at 100°C, pH 9 Tris Buffer H-3301    | EnVision Detection Systems Peroxidase/DAB, Rabbit/Mouse, HRP. Rabbit/Mouse (DAB+) #K500711 |
| <b>OCT4</b>          | Abcam #ab181557               | EPR17929   | Rabbit, 1:100, 30 min, RT                   | 10 min at 100°C, pH 9 Tris Buffer H-3301    | EnVision Detection Systems Peroxidase/DAB, Rabbit/Mouse, HRP. Rabbit/Mouse (DAB+) #K500711 |
| <b>ki-67 (Human)</b> | Dako_Agilent #GA626           | MIB-1      | Mouse, 1:500, 40 min, RT                    | 10 min at 100°C, pH 6 Citrate Buffer H-3300 | VECTASTAIN® ABC HRP Kit #PK-4000                                                           |
| <b>ki-67 (Mouse)</b> | Dako_Agilent #M7249           | TEC-3      | Rat, 1:200, 40 min, RT                      | 10 min at 100°C, pH 6 Citrate Buffer H-3300 | VECTASTAIN® ABC HRP Kit #PK-4000                                                           |
| <b>FZD7</b>          | Abcam #ab64636                | Polyclonal | Rabbit, 1:200, 40 min, RT                   | 10 min at 100°C, pH 9 Tris Buffer H-3301    | VECTASTAIN® ABC HRP Kit #PK-4000                                                           |

## SUPPLEMENTARY REFERENCES

1. Verfaillie A, *et al.* Decoding the regulatory landscape of melanoma reveals TEADS as regulators of the invasive cell state. *Nat Commun* **6**, 6683 (2015).
2. Sanz-Moreno V, *et al.* ROCK and JAK1 signaling cooperate to control actomyosin contractility in tumor cells and stroma. *Cancer Cell* **20**, 229-245 (2011).
3. Hoek KS, *et al.* Metastatic potential of melanomas defined by specific gene expression profiles with no BRAF signature. *Pigment Cell Res* **19**, 290-302 (2006).
