# Supplementary material for: WNT11-FZD7-DAAM1 signalling supports tumour initiating abilities and melanoma amoeboid invasion
Source: PubMed Central journal article supplement (PMC7575593; doi:10.1038/s41467-020-18951-2), 2020-10-20

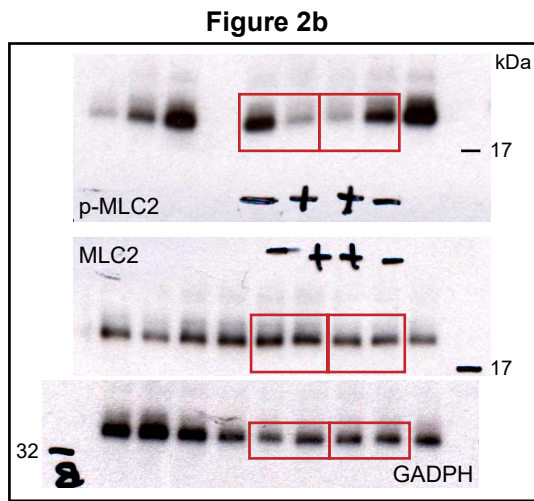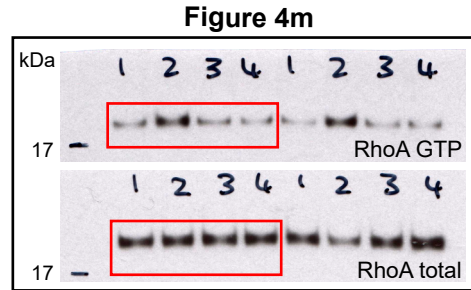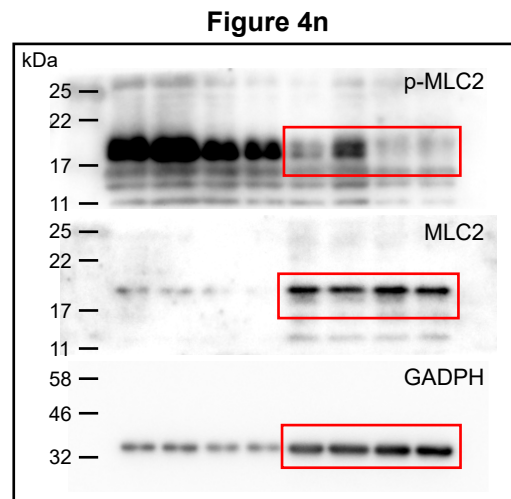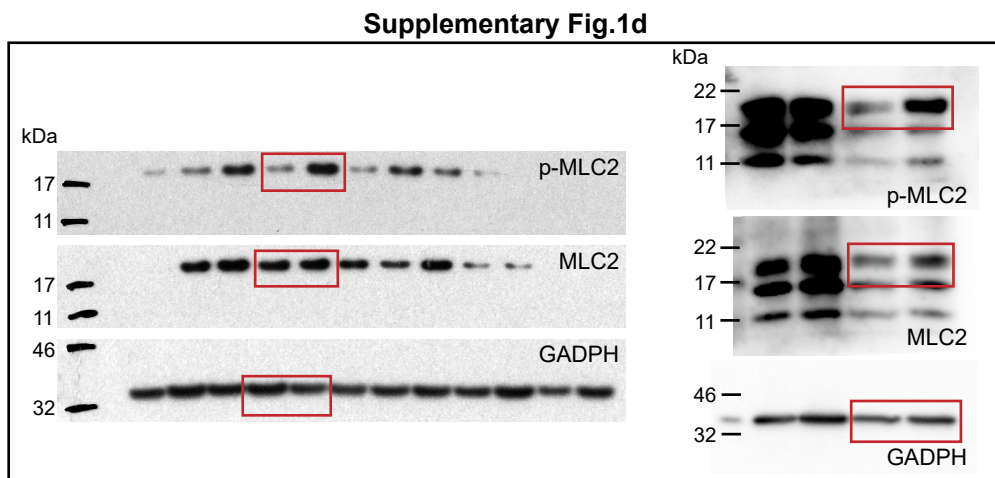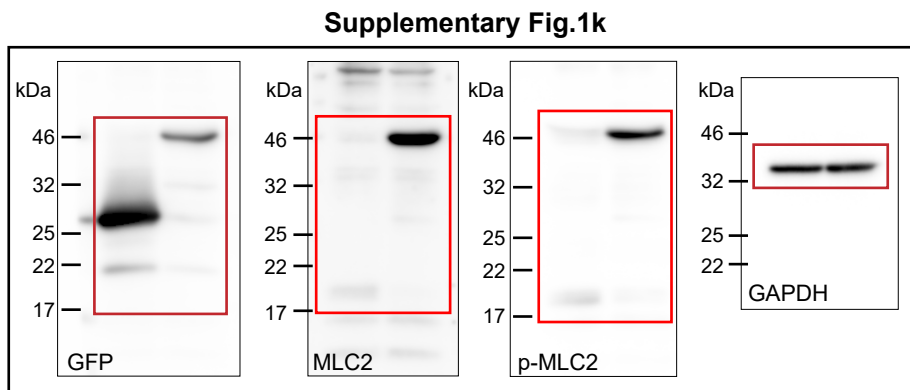

Supplementary Fig.2f

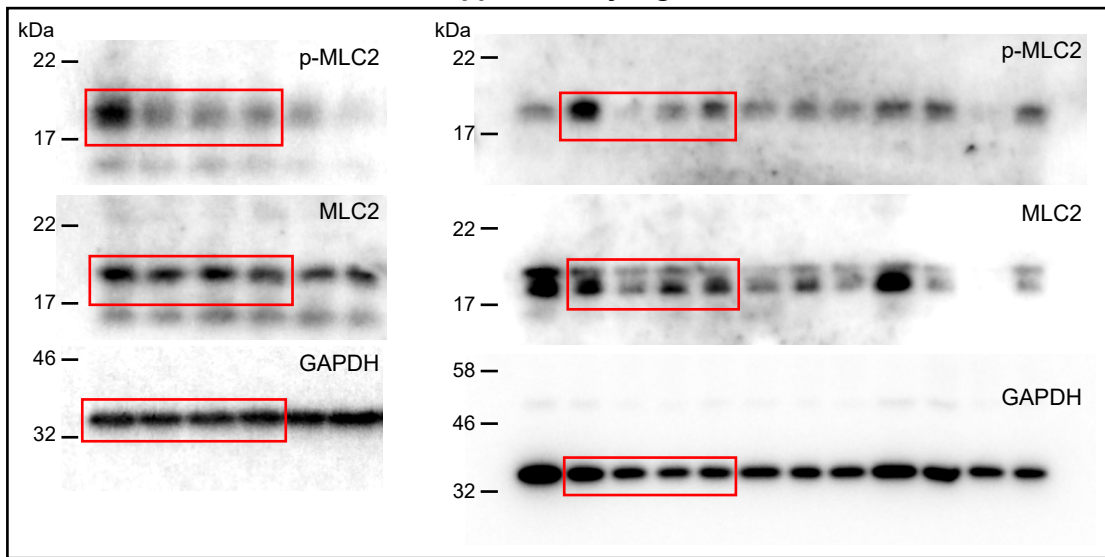

Supplementary Fig.2j

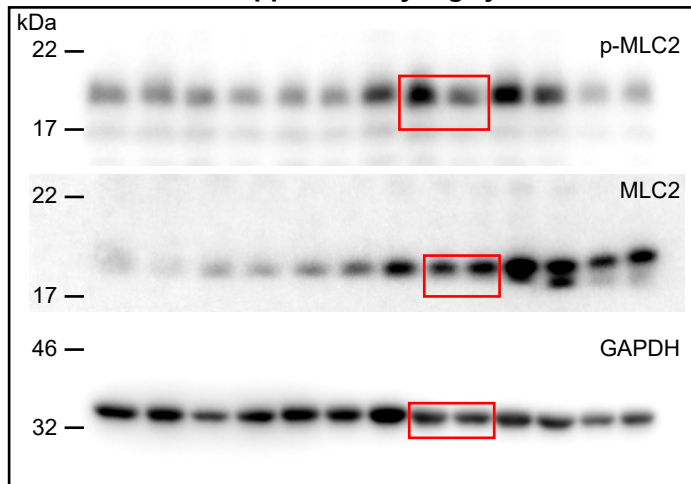

Supplementary Fig.3c

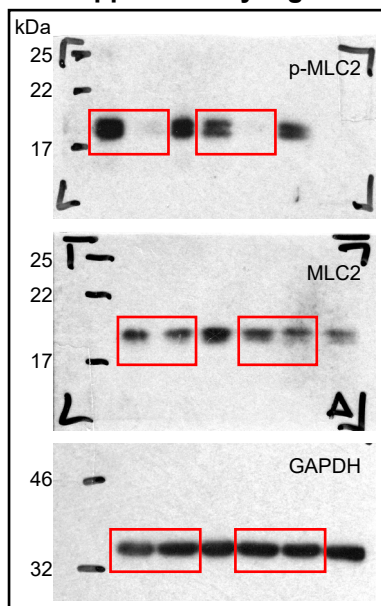

Supplementary Fig.4b

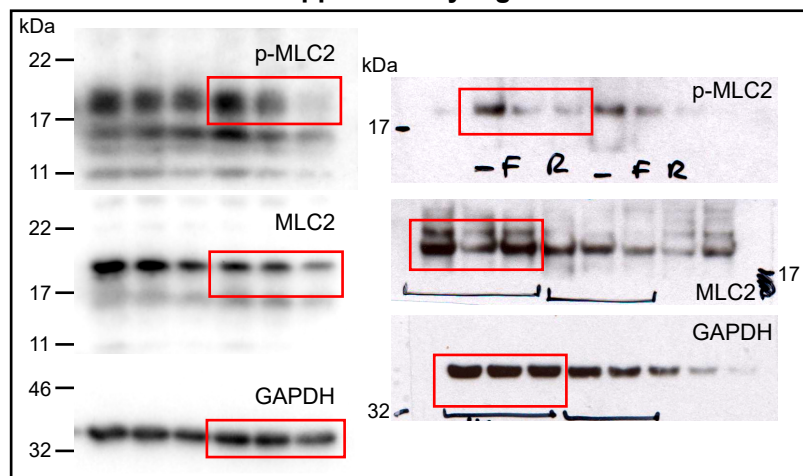

Supplementary Fig.4g

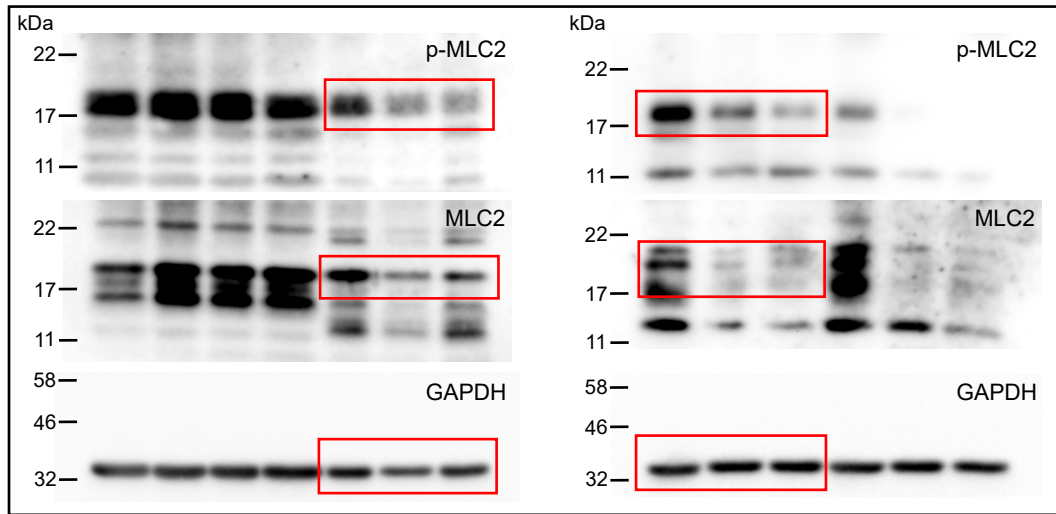

Supplementary Fig.4j

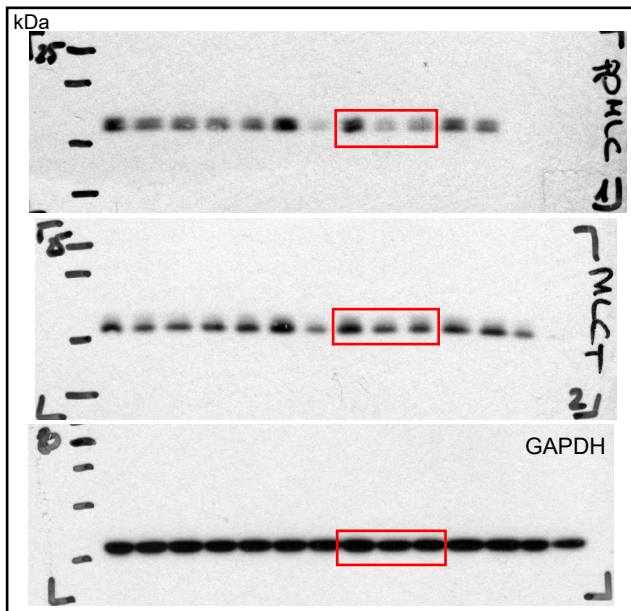

Supplementary Fig.4o

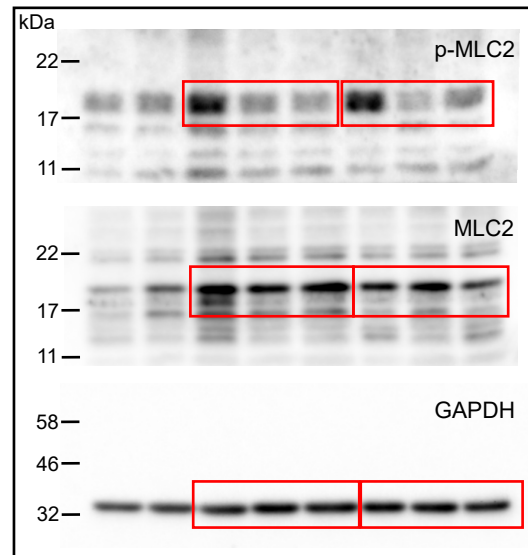

Supplementary Fig.7i

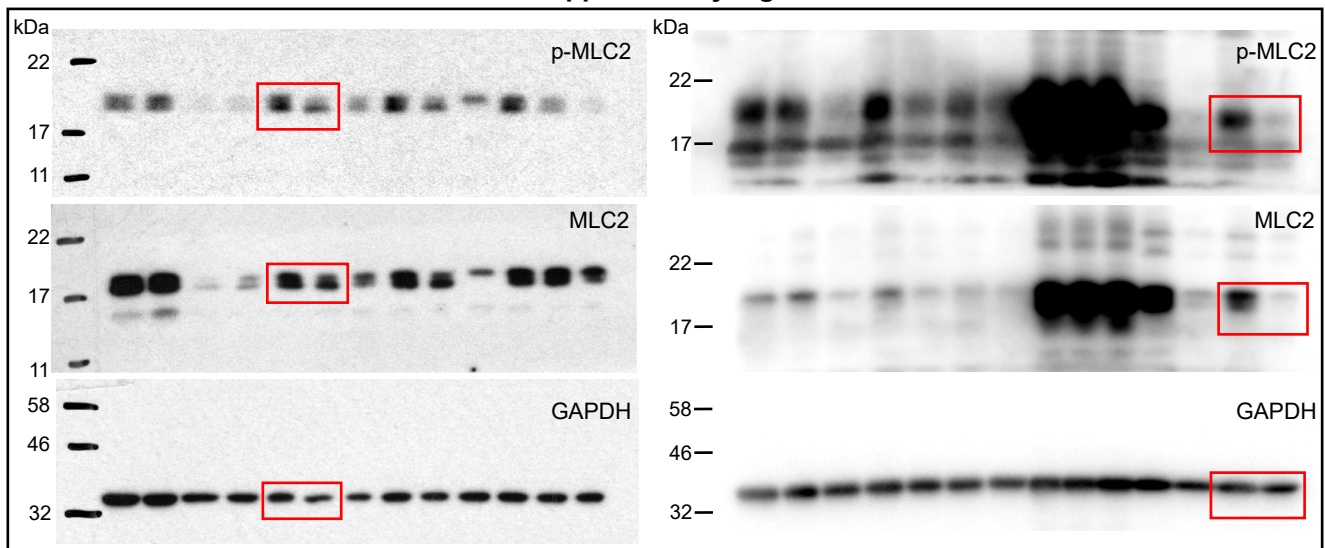

Supplement: 41467_2020_18951_MOESM4_ESM.pdf [file 41467_2020_18951_MOESM4_ESM.pdf]
